# Epigenetic gene silencing by heterochromatin primes fungal resistance

Sito Torres-Garcia, Pauline N. C. B. Audergon<sup>†</sup>, Manu Shukla, Sharon A. White,  
Alison L. Pidoux, Robin C. Allshire<sup>\*</sup>

Wellcome Centre *for* Cell Biology and Institute of Cell Biology,  
School of Biological Sciences,  
The University of Edinburgh,  
Mayfield Road,  
Edinburgh EH9 3BF, UK.

<sup>†</sup> Present address: Centre for Genomic Regulation (CRG),  
The Barcelona Institute of Science and Technology,  
Barcelona 08003, Spain

<sup>\*</sup> Corresponding author: E-mail: [robin.allshire@ed.ac.uk](mailto:robin.allshire@ed.ac.uk)

1 **Summary:**

2 **Genes embedded in H3 lysine 9 methylation (H3K9me)-dependent**  
3 **heterochromatin are transcriptionally silenced<sup>1-3</sup>. In fission yeast,**  
4 ***Schizosaccharomyces pombe*, H3K9me heterochromatin silencing can be**  
5 **transmitted through cell division provided the counteracting demethylase Epe1**  
6 **is absent<sup>4,5</sup>. It is possible that under certain conditions wild-type cells might**  
7 **utilize heterochromatin heritability to form epimutations, phenotypes mediated**  
8 **by unstable silencing rather than changes in DNA<sup>6,7</sup>. Here we show that resistant**  
9 **heterochromatin-mediated epimutants are formed in response to threshold**  
10 **levels of the external insult caffeine. ChIP-seq analyses of unstable resistant**  
11 **isolates revealed new distinct heterochromatin domains, which in some cases**  
12 **reduce the expression of underlying genes that are known to confer resistance**  
13 **when deleted. Targeting synthetic heterochromatin at implicated loci confirmed**  
14 **that resistance results from heterochromatin-mediated silencing. Our analyses**  
15 **reveal that epigenetic processes allow wild-type fission yeast to adapt to non-**  
16 **favorable environments without altering their genotype. In some isolates,**  
17 **subsequent or co-occurring gene amplification events enhance resistance.**  
18 **Thus, heterochromatin-dependent epimutant formation provides a bet-hedging**  
19 **strategy that allows cells to remain genetically wild-type but transiently adapt**  
20 **to external insults. As unstable caffeine-resistant isolates show cross-**  
21 **resistance to the fungicide clotrimazole it is likely that related heterochromatin-**  
22 **dependent processes contribute to anti-fungal resistance in both plant and**  
23 **human pathogenic fungi.**

24 **Main Text:**

25 H3K9me heterochromatin can be copied during replication by a read-write  
26 mechanism<sup>4,5</sup> and has been observed to arise stochastically at various loci, albeit only  
27 in the absence of key anti-silencing factors<sup>8-11</sup>. We reasoned that if heterochromatin  
28 can redistribute in wild-type *S. pombe* cells epimutations could be generated that  
29 allow cells to adapt to external insults. Unlike genetic mutants we predicted that such  
30 epimutants would be unstable, resulting in gradual loss of the resistance phenotype  
31 following growth in the absence of the external insult. To explore this possibility, we  
32 chose to test caffeine resistance because deletion of genes with a wide variety of  
33 cellular roles is known to confer resistance<sup>12</sup>, thereby increasing the chance of  
34 obtaining epimutations. We also reasoned that such unstable epimutants would  
35 occur more frequently at moderate caffeine concentrations that prevent most cells  
36 from growing (16 mM) rather than at high stringency selection (20 mM) used in  
37 screens for genetic caffeine-resistant mutants<sup>12</sup>.

38 As other secondary events might also occur upon prolonged growth on caffeine, we  
39 froze one aliquot of each isolate as soon as possible after resistant colony formation  
40 and then froze consecutive aliquots of each isolate after continued growth on caffeine  
41 (Fig. 1a). This provided a time series, permitting detection and separation of potential  
42 initiating and subsequent secondary events.

43 Colonies that grew after plating wild-type fission yeast (972 *h*<sup>-1</sup>) cells in the presence  
44 of caffeine (16 mM caffeine, +CAF) were picked. Following freezing, isolates were  
45 then successively propagated in the absence of caffeine (-CAF). Re-challenging  
46 isolates with caffeine revealed that 23% lost their caffeine resistance after 14 days of

47 non-selective growth (denoted 'unstable isolates', UR) whereas 13% remained  
48 caffeine resistant (denoted 'stable isolates', SR). 64% of isolates did not display a  
49 clear phenotype (denoted 'unclear') (Fig. 1b, c and Extended Data Fig. 1a, b).

50 Deletion of *clr4*<sup>+</sup> encoding the sole H3K9 methyltransferase in *S. pombe*<sup>13,14</sup> from  
51 resistant isolates resulted in immediate loss of caffeine resistance in unstable, but not  
52 in stable isolates (Fig. 1d and Extended Data Fig. 1c), indicating that caffeine  
53 resistance in unstable isolates requires heterochromatin.

54 Whole genome sequencing (WGS) of the stable isolate SR-1 uncovered a mutation in  
55 *pap1*<sup>+</sup> responsible for the caffeine-resistant phenotype (Extended Data Fig. 2 and <sup>15</sup>).

56 ChIP-seq for H3K9me2 on SR-1 revealed no changes in heterochromatin distribution.

57 WGS of unstable isolates revealed no genetic changes in coding sequences involved  
58 in either caffeine resistance or H3K9me2-mediated silencing, and 8 of 30 analyzed  
59 unstable isolates had no detectable genetic change compared to wild-type  
60 (Supplementary Information Table 1). ChIP-seq for H3K9me2 on unstable isolates  
61 revealed an altered heterochromatin distribution (Fig. 2a, b). Unstable resistant isolate  
62 UR-1 exhibited a new H3K9me2 domain over the *hba1* locus, whereas UR-2 – UR-6  
63 exhibited H3K9me2 domains over *ncRNA.394*, *ppr4*, *grt1*, *fio1* and *mbx2* loci,  
64 respectively (Fig. 2a, b and Supplementary Information Table 1). Deletion of *hba1*<sup>+</sup> is  
65 known to confer caffeine resistance<sup>16</sup>, suggesting that these novel heterochromatin  
66 domains may drive caffeine resistance by silencing underlying genes. Accordingly,  
67 RT-qPCR analysis revealed reduced expression of genes underlying the observed  
68 novel heterochromatin domain at the *hba1* locus (Fig. 2c).

69 The *ncRNA.394*, *ppr4*, *grt1*, *fio1* and *mbx2* loci have not previously been implicated  
70 in caffeine resistance. Interestingly, 24 of 30 unstable isolates showed an ectopic  
71 heterochromatin domain over the *ncRNA.394* locus (Extended Data Fig. 3a and  
72 Supplementary Information Table 1), and reduced levels of transcripts were present  
73 (Fig. 2c), suggesting that transcriptional silencing within this region might mediate  
74 caffeine resistance. *ncRNA.394* was previously described as a heterochromatin  
75 'island'<sup>8</sup>, yet H3K9me2 levels over this locus were close to background in wild-type  
76 cells and only increased in the absence of the counteracting demethylase Epe1. Our  
77 analysis failed to detect H3K9me2 over *ncRNA.394* in untreated wild-type cells (Fig.  
78 2b and Extended Data Fig. 3a).

79 Deletion of *ncRNA.394* did not result in caffeine resistance (Extended Data Fig. 3b).  
80 Prolonged non-selective growth without caffeine of cells exhibiting the *ncRNA.394*  
81 H3K9me2 domain resulted in loss of H3K9me2 over this region, whereas growth with  
82 caffeine present extended the H3K9me2 domain upstream to include the  
83 *SPBC17G9.13c<sup>+</sup>* and *SPBC17G9.12c<sup>+</sup>* genes (Extended Data Fig. 3c). Deletion of  
84 *SPBC17G9.12c<sup>+</sup>* or *eno101<sup>+</sup>* did not result in caffeine resistance (Extended Data Fig.  
85 3b). *SPBC17G9.13c<sup>+</sup>* is essential for viability precluding testing a deletion mutant for  
86 resistance. Together these analyses suggest that reduced expression of  
87 *SPBC17G9.13c<sup>+</sup>* may mediate caffeine resistance.

88 To test directly if heterochromatin formation at these specific loci can result in caffeine  
89 resistance, *tetO* DNA binding sites were inserted at the *hba1* and *ncRNA.394* loci and  
90 a TetR-Clr4\* (catalytically active but lacking the Clr4 chromodomain) fusion protein  
91 expressed to force assembly of synthetic heterochromatin upon recruitment to these

92 loci<sup>4,5</sup>. Combining *tetO* with TetR-Clr4\* in the absence of anhydrotetracycline (-AHT)  
93 resulted in a novel H3K9me2 domain at each locus and growth of cells in the  
94 presence of caffeine (Fig. 3 and Extended Data Fig. 4). This indicates that  
95 heterochromatin-mediated silencing at either the *hba1* or *ncRNA.394* loci results in  
96 caffeine resistance. Because TetR-Clr4\* tethering close to *SPBC17G9.13c+* resulted  
97 in caffeine resistance we surmise that reduced expression of the *SPBC17G9.13c+*  
98 gene upstream of *ncRNA.394* is likely responsible for caffeine resistance at this locus.

99 Remarkably, we found that strains with forced synthetic heterochromatin at either  
100 *hba1* or *ncRNA.394* loci displayed resistance to the widely-used clinical fungicide  
101 clotrimazole (Fig. 3, +CLZ). Further investigation of our unstable caffeine-resistant  
102 isolates revealed that those with heterochromatin formation at the *hba1* (UR-1) and  
103 the *ncRNA.394* (UR-2) loci are also resistant to clotrimazole and generate small  
104 interfering RNAs (siRNAs) homologous to the surrounding genes (Extended Data Fig.  
105 5).

106 In addition to a heterochromatin domain over *ncRNA.394*, analysis of ChIP-seq input  
107 DNA indicated that many independent unstable caffeine-resistant isolates also  
108 contained overlapping regions of chromosome III present at increased copy number  
109 (Extended Data Fig. 6). In 11 of 12 isolates, the minimal region of overlap contains the  
110 *cds1+* gene, overexpression of which is known to confer caffeine resistance<sup>17</sup>. To  
111 determine if amplification of the *cds1* locus occurred before or after formation of the  
112 *ncRNA.394* H3K9me2 domain we analyzed a sample frozen later in the time series  
113 for the same isolate (UR-2). ChIP-seq analysis showed that the *ncRNA.394* H3K9me2  
114 domain was present in the initial caffeine-resistant isolate (4 days +CAF), whereas the

115 *cds1* locus amplification arose later (7 days +CAF) (Extended Data Fig. 7a). These  
116 data suggest that development of resistance is a multistep process in which a  
117 combination of different events can increase resistance. In agreement with this  
118 hypothesis, deletion of *clr4*<sup>+</sup> in the initial UR-2 isolate (4 days +CAF) resulted in loss  
119 of caffeine resistance in all transformants tested (6/6) (Extended Data Fig. 7b and 1c).  
120 However, only half of the transformants (3/6) lost resistance to caffeine when *clr4*<sup>+</sup>  
121 was deleted in the isolate displaying *cds1* locus amplification (7 days +CAF),  
122 suggesting that once amplification of the *cds1* locus occurs heterochromatin is not  
123 required for resistance. In UR-2 a new heterochromatin domain occurred before  
124 *cds1*<sup>+</sup> amplification but it is possible that events are stochastic and occur in no fixed  
125 order. Interestingly, both events – the *ncRNA.394* H3K9me2 domain and *cds1* locus  
126 amplification – are unstable and lost following growth in the absence of caffeine  
127 (Extended Data Fig. 7c).

128 To investigate the dynamics of heterochromatin domain formation in response to  
129 caffeine we exposed wild-type cells to low (7 mM) or medium (14 mM) doses of  
130 caffeine for 18 hours. Cells in low caffeine accomplished ~8 doublings, whereas fewer  
131 than 3 population doublings occurred in medium caffeine. ChIP-seq for H3K9me2  
132 identified several new ectopic domains of heterochromatin following exposure to low  
133 caffeine. Ectopic domains were detected at loci known to accumulate H3K9me2 in  
134 the absence of Epe1<sup>8</sup>, including *ncRNA.394* (Fig. 4a, top). Remarkably, following  
135 treatment with medium doses of caffeine, ectopic heterochromatin was restricted to  
136 *ncRNA.394*, and H3K9me2 levels at this locus were approximately 2-fold greater than  
137 those after exposure to low caffeine (Fig. 4a, bottom). Together these data indicate  
138 that, when exposed to near-lethal doses of caffeine (medium, 14 mM), wild-type cells

139 can rapidly develop resistance by forming heterochromatin over a locus (*ncRNA.394*)  
140 that confers resistance when silenced.

141 To determine if other insults also induce novel heterochromatin domains, we exposed  
142 wild-type cells to oxidative stress by addition of hydrogen peroxide (1 mM). ChIP-seq  
143 for H3K9me2 revealed the presence of ectopic heterochromatin domains at similar  
144 locations to those observed in low caffeine treatment, albeit H3K9me2 levels were  
145 lower (Fig. 4b). Thus, our results reveal an adaptive epigenetic response following  
146 exposure to external insults, and suggest that stress-response pathways may  
147 regulate activities that modulate heterochromatin formation thereby ensuring cell  
148 survival in fluctuating environmental conditions (Extended Data Fig. 8).

149 It is well known that DNA methylation-dependent epimutations arise in plants and are  
150 propagated by maintenance methyltransferases<sup>18,19</sup>. RNAi-mediated epimutations  
151 have been shown to arise in the fungus *Mucor circinelloides*<sup>20</sup>, but it is not known if  
152 these are DNA methylation or heterochromatin dependent. As fission yeast lacks DNA  
153 methylation<sup>21,22</sup> this epigenetic mark cannot be responsible for the epimutations  
154 described here. Instead our analyses indicate that these adaptive epimutations are  
155 transmitted in wild-type cells by the previously-identified Clr4/H3K9me read-write  
156 mechanism<sup>4,5</sup>.

157 Our findings prompt the question as to why epimutants have not been detected  
158 previously in mutant screens. Phenotypic screens are usually very stringent, and  
159 generally only the strongest mutants are retained for further investigation and  
160 eccentric mutants are discarded. Here we essentially select for weak mutants by  
161 applying low doses of a drug that is at the threshold of preventing the growth of most



162 cells. Selection was applied for a short period of time in order to maximize the chance  
163 of identifying isolates that exhibit unstable phenotypes prior to the development of  
164 genetic alterations.

165 Fungal infections are on the rise, especially in immunocompromised humans. There  
166 are few effective anti-fungal agents and resistance is rendering them increasingly  
167 ineffective<sup>23,24</sup>. The widespread use of related azole compounds to control fungal  
168 deterioration of crops may leave low fungicide levels in the soil, possibly leading to  
169 the unwitting selection of resistant epimutants in fungi, similar to those described  
170 here, that may ultimately drive the increasing number of cases of azole-resistant  
171 Aspergillosis and Cryptococcosis in the clinic. Use of the existing battery of so called  
172 'epigenetic drugs' - compounds that inhibit histone modifying enzymes - may identify  
173 molecules that block heterochromatin formation and hence reduce the emergence of  
174 anti-fungal resistance in plant and animal pathogenic fungi.

175

176

177

178

179

180

181

182 **References**

- 183 1. Bannister, A. J. *et al.* Selective recognition of methylated lysine 9 on histone H3  
184 by the HP1 chromo domain. *Nature* **410**, 120–124 (2001).
- 185 2. Lachner, M., O'Carroll, D., Rea, S., Mechtler, K. & Jenuwein, T. Methylation of  
186 histone H3 lysine 9 creates a binding site for HP1 proteins. *Nature* **410**, 116–  
187 120 (2001).
- 188 3. Allshire, R. C. & Madhani, H. D. Ten principles of heterochromatin formation  
189 and function. *Nat. Rev. Mol. Cell Biol.* **45**, 153 (2017).
- 190 4. Audergon, P. N. C. B. *et al.* Epigenetics. Restricted epigenetic inheritance of  
191 H3K9 methylation. *Science* **348**, 132–135 (2015).
- 192 5. Ragunathan, K., Jih, G. & Moazed, D. Epigenetics. Epigenetic inheritance  
193 uncoupled from sequence-specific recruitment. *Science* **348**, 1258699–  
194 1258699 (2015).
- 195 6. Jeggo, P. A. & Holliday, R. Azacytidine-induced reactivation of a DNA repair  
196 gene in Chinese hamster ovary cells. *Mol. Cell. Biol.* **6**, 2944–2949 (1986).
- 197 7. Oey, H. & Whitelaw, E. On the meaning of the word 'epimutation'. *Trends*  
198 *Genet.* **30**, 519–520 (2014).
- 199 8. Zofall, M. *et al.* RNA elimination machinery targeting meiotic mRNAs promotes  
200 facultative heterochromatin formation. *Science* **335**, 96–100 (2012).

- 201 9. Wang, J., Reddy, B. D. & Jia, S. Rapid epigenetic adaptation to uncontrolled  
202 heterochromatin spreading. *eLife* **4**, 80 (2015).
- 203 10. Parsa, J.-Y., Boudoukha, S., Burke, J., Homer, C. & Madhani, H. D. Polymerase  
204 pausing induced by sequence-specific RNA-binding protein drives  
205 heterochromatin assembly. *Genes Dev.* **32**, 953–964 (2018).
- 206 11. Sorida, M. *et al.* Regulation of ectopic heterochromatin-mediated epigenetic  
207 diversification by the JmjC family protein Epe1. *PLoS Genet.* **15**, e1008129  
208 (2019).
- 209 12. Calvo, I. A. *et al.* Genome-wide screen of genes required for caffeine tolerance  
210 in fission yeast. *PLoS ONE* **4**, e6619 (2009).
- 211 13. Ivanova, A. V., Bonaduce, M. J., Ivanov, S. V. & Klar, A. J. The chromo and SET  
212 domains of the Clr4 protein are essential for silencing in fission yeast. *Nat Genet*  
213 **19**, 192–195 (1998).
- 214 14. Nakayama, J., Rice, J. C., Strahl, B. D., Allis, C. D. & Grewal, S. I. Role of histone  
215 H3 lysine 9 methylation in epigenetic control of heterochromatin assembly.  
216 *Science* **292**, 110–113 (2001).
- 217 15. Kudo, N., Taoka, H., Toda, T., Yoshida, M. & Horinouchi, S. A novel nuclear  
218 export signal sensitive to oxidative stress in the fission yeast transcription factor  
219 Pap1. *J. Biol. Chem.* **274**, 15151–15158 (1999).
- 220 16. Castillo, E. A., Vivancos, A. P., Jones, N., Ayté, J. & Hidalgo, E.  
221 *Schizosaccharomyces pombe* cells lacking the Ran-binding protein Hba1 show

- 222 a multidrug resistance phenotype due to constitutive nuclear accumulation of  
223 Pap1. *J. Biol. Chem.* **278**, 40565–40572 (2003).
- 224 17. Wang, S. W., Norbury, C., Harris, A. L. & Toda, T. Caffeine can override the S-  
225 M checkpoint in fission yeast. *J. Cell. Sci.* **112 ( Pt 6)**, 927–937 (1999).
- 226 18. Cubas, P., Vincent, C. & Coen, E. An epigenetic mutation responsible for natural  
227 variation in floral symmetry. *Nature* **401**, 157–161 (1999).
- 228 19. Heard, E. & Martienssen, R. A. Transgenerational epigenetic inheritance: myths  
229 and mechanisms. *Cell* **157**, 95–109 (2014).
- 230 20. Calo, S. *et al.* Antifungal drug resistance evoked via RNAi-dependent  
231 epimutations. *Nature* **513**, 555–558 (2014).
- 232 21. Antequera, F., Tamame, M., Villanueva, J. R. & Santos, T. DNA methylation in  
233 the fungi. *J. Biol. Chem.* **259**, 8033–8036 (1984).
- 234 22. Wilkinson, C. R., Bartlett, R., Nurse, P. & Bird, A. P. The fission yeast gene  
235 *pmt1+* encodes a DNA methyltransferase homologue. *Nucleic Acids Res.* **23**,  
236 203–210 (1995).
- 237 23. Fisher, M. C., Hawkins, N. J., Sanglard, D. & Gurr, S. J. Worldwide emergence  
238 of resistance to antifungal drugs challenges human health and food security.  
239 *Science* **360**, 739–742 (2018).
- 240 24. Almeida, F., Rodrigues, M. L. & Coelho, C. The Still Underestimated Problem  
241 of Fungal Diseases Worldwide. *Front Microbiol* **10**, 214 (2019).

## 242 **Methods**

### 243 **Yeast strains and manipulations**

244 Standard methods were used for fission yeast growth, genetics and manipulation<sup>25</sup>.  
245 *S. pombe* strains used in this study are described in Supplementary Information Table  
246 S2. Oligonucleotide sequences are listed in Supplementary Information Table S3. For  
247 pDUAL-*adh21*-TetR-2xFLAG-Clr4-CD $\Delta$  (abbreviated as TetR-Clr4\*), the *nmt81*  
248 promoter of pDUAL-*nmt81*-TetR-2xFLAG-Clr4-CD $\Delta^4$ , was replaced by the *adh21*  
249 promoter (pRAD21, gift from Y. Watanabe). *NotI*-digested plasmid was integrated at  
250 *leu1*<sup>+</sup>. Pap1-N424STOP strain and strains carrying *4xtetO* insertions were  
251 constructed by CRISPR/Cas9-mediated genome editing using the *SpEDIT* system  
252 (Allshire Lab; available on request) with oligonucleotides listed in Supplementary  
253 Information Table S3. Yeast extract plus supplements (YES) was used to grow all  
254 cultures. 16 mM caffeine (Sigma, C0750) was added to media for caffeine resistance  
255 screens and serial dilution assays. Caffeine-resistant colonies that formed after seven  
256 days were picked and patched to +CAF plates. After four days of growth, isolates  
257 were frozen (4 days +CAF). 4 days +CAF isolates were repatched and grown for three  
258 days on +CAF plates and then frozen (7 days +CAF). Subsequently, 7 days +CAF  
259 isolates were repatched every three days on +CAF plates up to twenty days of total  
260 growth on +CAF plates (20 days +CAF). 0.29  $\mu$ M clotrimazole (Sigma, C6019) was  
261 added to media for clotrimazole resistance serial dilution assays. 7 or 14 mM caffeine  
262 (Sigma, C0750), or 1 mM hydrogen peroxide (Sigma, H1009) were added to media  
263 for 18 hours for drug treatment experiments. To release TetR-Clr4\*, 10  $\mu$ M  
264 anhydrotetracycline (AHT) was added to the media.

## 265 **Serial dilution assays**

266 Equal amounts of starting cells were serially diluted four-fold and then spotted onto  
267 appropriate media. Cells were grown at 30-32°C for 3-5 days and then photographed.

## 268 **Chromatin immunoprecipitation (ChIP)**

269 ChIP experiments were performed as previously described<sup>26</sup> using anti-H3K9me2  
270 (5.1.1, a kind gift by Takeshi Urano). Immunoprecipitated DNA was recovered with  
271 Chelex-100 resin (BioRad) for ChIP-qPCR (qChIP) experiments or with QIAquick  
272 PCR Purification Kit (Qiagen) for ChIP-seq experiments.

## 273 **Quantitative ChIP (qChIP)**

274 qChIPs were analysed by real-time PCR using Lightcycler 480 SYBR Green (Roche)  
275 with oligonucleotides listed in Supplementary Information Table S3. All ChIP  
276 enrichments were calculated as % DNA immunoprecipitated at the locus of interest  
277 relative to the corresponding input samples and normalized to % DNA  
278 immunoprecipitated at the *act1*<sup>+</sup> locus. Histograms represent data averaged over  
279 three biological replicates. Error bars represent standard deviations.

## 280 **ChIP-seq library preparation and analysis**

281 Illumina-compatible libraries were prepared as previously described<sup>26</sup> using  
282 NEXTflex-96 barcode adapters (Bioo Scientific) and Ampure XP beads (Beckman  
283 Coulter). Libraries were then pooled to allow multiplexing and sequenced on an  
284 Illumina HiSeq2000, NextSeq or MiniSeq system (150-cycle high output kit) by 75 bp  
285 paired-end sequencing.

286 Approximately 6-10 million 75 bp paired-end reads were produced for each sample.  
287 Raw reads were then de-multiplexed and trimmed using Trimmomatic (v0.35)<sup>27</sup> to  
288 remove adapter contamination and regions of poor sequencing quality. Trimmed  
289 reads were aligned to the *S. pombe* reference genome (972h<sup>-</sup>, ASM294v2.20) using  
290 Bowtie2 (v2.3.3)<sup>28</sup>. Resulting bam files were processed using Samtools (v1.3.1)<sup>29</sup> and  
291 picard-tools (v2.1.0) (<http://broadinstitute.github.io/picard>) for sorting, removing  
292 duplicates and indexing. Coverage bigwig files were generated by BamCoverage  
293 (deepTools v2.0) and ratios IP/input were calculated using BamCompare (deepTools  
294 v2.0)<sup>30</sup> in SES mode for normalisation<sup>31</sup>. Peaks were called using MACS2<sup>32</sup> in PE mode  
295 and broad peak calling (broad-cutoff = 0.05). Region-specific H3K9me2 enrichment  
296 plots were generated using the Sushi R package (v1.22)<sup>33</sup>.

### 297 **SNP and indel calling**

298 SNPs and indels were called as described<sup>34</sup>. Trimmed reads were mapped to the *S.*  
299 *pombe* reference genome (972h<sup>-</sup>, ASM294v2.20) using Bowtie2 (v2.3.3)<sup>28</sup>. GATK<sup>35,36</sup>  
300 was used for base quality score recalibration. SNPs and indels were called with GATK  
301 HaplotypeCaller<sup>35,36</sup> and filtered using custom parameters. Functional effect of  
302 variants was determined using Variant Effect Predictor<sup>37</sup>.

### 303 **Copy number variation analysis**

304 Copy number variation was determined using CNVkit<sup>38</sup> in Whole-Genome  
305 Sequencing (-wgs) mode. Wild-type ChIP-seq input bam files were used as reference.

306

307

308 **qRT-PCR analysis**

309 For qRT-PCR, total RNA was extracted using the Monarch Total RNA Miniprep Kit  
310 (New England Biolabs) according to the manufacturer's instructions. Contaminating  
311 DNA was removed by treating with Turbo DNase (Invitrogen) and reverse transcription  
312 was performed using LunaScript RT Supermix Kit (New England Biolabs).  
313 Oligonucleotides used for qRT-PCR are listed in Supplementary Information Table  
314 S3. qRT-PCR histograms represent three biological replicates; error bars correspond  
315 to the standard deviation. \*  $P < 0.05$  ( $t$  test).

316 **Small RNA-seq**

317 50 mL of log-phase cells were collected and processed using the mirVana miRNA  
318 Isolation kit (Invitrogen). Resulting sRNA was treated with TURBO DNase  
319 (Invitrogen) and used for library construction using NEBNext Multiplex Small RNA  
320 Library Prep Set for Illumina (New England Biolabs) according to manufacturer's  
321 instructions. Libraries were pooled and sequenced on an Illumina NextSeq platform  
322 by 50 bp single-end sequencing. Raw reads were then de-multiplexed and  
323 processed using Cutadapt (v1.17) to remove adapter contamination and discard  
324 reads shorter than 19 nucleotides or longer than 25 nucleotides. Coverage plots were  
325 generated using SCRAM<sup>39</sup>.

326

327

328



329

330

331

332

333

334

335

336

337

338

339

340

341

342

343

344

345

346 **Additional references for Methods section**

- 347 25. Moreno, S., Klar, A. & Nurse, P. Molecular genetic analysis of fission yeast  
348 *Schizosaccharomyces pombe*. *Meth. Enzymol.* **194**, 795–823 (1991).
- 349 26. Tong, P. *et al.* Interspecies conservation of organisation and function between  
350 nonhomologous regional centromeres. *Nat Commun* **10**, 2343 (2019).
- 351 27. Bolger, A. M., Lohse, M. & Usadel, B. Trimmomatic: a flexible trimmer for  
352 Illumina sequence data. *Bioinformatics* **30**, 2114–2120 (2014).
- 353 28. Langmead, B. & Salzberg, S. L. Fast gapped-read alignment with Bowtie 2. *Nat.*  
354 *Methods* **9**, 357–359 (2012).
- 355 29. Li, H. *et al.* The Sequence Alignment/Map format and SAMtools. *Bioinformatics*  
356 **25**, 2078–2079 (2009).
- 357 30. Ramírez, F. *et al.* deepTools2: a next generation web server for deep-  
358 sequencing data analysis. *Nucleic Acids Res.* **44**, W160–5 (2016).
- 359 31. Diaz, A., Park, K., Lim, D. A. & Song, J. S. Normalization, bias correction, and  
360 peak calling for ChIP-seq. *Stat Appl Genet Mol Biol* **11**, Article 9 (2012).
- 361 32. Zhang, Y. *et al.* Model-based analysis of ChIP-Seq (MACS). *Genome Biol.* **9**,  
362 R137 (2008).
- 363 33. Phanstiel, D. H., Boyle, A. P., Araya, C. L. & Snyder, M. P. Sushi.R: flexible,  
364 quantitative and integrative genomic visualizations for publication-quality multi-  
365 panel figures. *Bioinformatics* **30**, 2808–2810 (2014).

- 366 34. Jeffares, D. C. *et al.* The genomic and phenotypic diversity of  
367 *Schizosaccharomyces pombe*. *Nat Genet* **47**, 235–241 (2015).
- 368 35. McKenna, A. *et al.* The Genome Analysis Toolkit: a MapReduce framework for  
369 analyzing next-generation DNA sequencing data. *Genome Res.* **20**, 1297–1303  
370 (2010).
- 371 36. Van der Auwera, G. A. *et al.* From FastQ data to high confidence variant calls:  
372 the Genome Analysis Toolkit best practices pipeline. *Curr Protoc Bioinformatics*  
373 **43**, 11.10.1–33 (2013).
- 374 37. McLaren, W. *et al.* The Ensembl Variant Effect Predictor. *Genome Biol.* **17**, 122  
375 (2016).
- 376 38. Talevich, E., Shain, A. H., Botton, T. & Bastian, B. C. CNVkit: Genome-Wide  
377 Copy Number Detection and Visualization from Targeted DNA Sequencing.  
378 *PLoS Comput. Biol.* **12**, e1004873 (2016).
- 379 39. Fletcher, S. J., Boden, M., Mitter, N. & Carroll, B. J. SCRAM: a pipeline for fast  
380 index-free small RNA read alignment and visualization. *Bioinformatics* **34**,  
381 2670–2672 (2018).

382

383

384

385

386 **Acknowledgments**

387 We thank Lorenza Di Pompeo and Andreas Fellas for laboratory support, Pin Tong  
388 and Ryan Ard for sharing technical expertise and members of the Allshire lab for  
389 valuable discussions. We are grateful to Adrian Bird, Wendy Bickmore and Lucia  
390 Massari for comments on the manuscript. We thank Takeshi Urano for kindly  
391 providing the 5.1.1 (H3K9me) antibody and Yoshinori Watanabe for the pRAD21  
392 plasmid. S.T-G. was supported by the Darwin Trust of Edinburgh. R.C.A. is a  
393 Wellcome Principal Research Fellow (095021, 200885); the Wellcome Centre for Cell  
394 Biology is supported by core funding from Wellcome (203149).

395 **Author contributions**

396 S.T-G., P.N.C.B.A. and R.C.A. conceived the project. S.T-G. and P.N.C.B.A.  
397 performed preliminary studies. S.T-G. performed experiments and bioinformatics.  
398 M.S. and A.L.P. contributed to ChIP-seq and qChIP experiments. S.A.W. contributed  
399 to sRNA-seq experiments. S.T-G., A.L.P. and R.C.A. wrote the manuscript.

400 **Competing interests**

401 The authors declare no competing interests.

402

403

404

**Supplementary Information Table 1. Summary of epigenetic (H3K9me2 domains) and genetic (SNPs, indels and copy number variation) changes found in unstable (UR) caffeine-resistant isolates.**

| Isolate | Ectopic heterochromatin location |                   | SNPs or indels in coding sequences? | Partial duplication of <i>Chr III</i> ? |
|---------|----------------------------------|-------------------|-------------------------------------|-----------------------------------------|
|         | <i>ncRNA.394</i>                 | other loci        |                                     |                                         |
| UR-1    |                                  | ✓ ( <i>hba1</i> ) | Clr5-Q264STOP / Meu27-S100Y         |                                         |
| UR-2    | ✓                                |                   | Sdo1-R11C                           |                                         |
| UR-3    |                                  | ✓ ( <i>ppr4</i> ) | Clr5-Q264STOP / Meu27-S100Y         |                                         |
| UR-4    |                                  | ✓ ( <i>grt1</i> ) | -                                   | ✓                                       |
| UR-5    |                                  | ✓ ( <i>fio1</i> ) | Clr5-Q264STOP / Meu27-S100Y         | ✓                                       |
| UR-6    |                                  | ✓ ( <i>mbx2</i> ) | -                                   | ✓                                       |
| UR-7    |                                  | ✓ ( <i>ppr4</i> ) | Clr5-Q264STOP / Meu27-S100Y         |                                         |
| UR-8    | ✓                                |                   | -                                   |                                         |
| UR-9    | ✓                                |                   | -                                   |                                         |
| UR-10   | ✓                                |                   | Cob1-F318L                          |                                         |
| UR-11   | ✓                                |                   | -                                   |                                         |
| UR-12   | ✓                                |                   | -                                   |                                         |
| UR-13   | ✓                                |                   | -                                   | ✓                                       |
| UR-14   | ✓                                |                   | Npp-W300STOP / SPBC16H5.13-S1011L   | ✓                                       |
| UR-15   | ✓                                |                   | -                                   | ✓                                       |
| UR-16   | ✓                                |                   | -                                   |                                         |
| UR-17   | ✓                                |                   | SPCC777.02-R120R                    | ✓                                       |
| UR-18   | ✓                                |                   | SPCC777.02-R120R                    | ✓                                       |
| UR-19   | ✓                                |                   | Sdo1-R11C                           | ✓                                       |
| UR-20   | ✓                                |                   | -                                   |                                         |
| UR-21   | ✓                                |                   | -                                   | ✓                                       |
| UR-22   | ✓                                |                   | -                                   | ✓                                       |
| UR-23   | ✓                                |                   | Pch1-Q234STOP                       |                                         |
| UR-24   | ✓                                |                   | -                                   |                                         |
| UR-25   | ✓                                |                   | -                                   | ✓                                       |
| UR-26   | ✓                                |                   | SPBC1271.08c-A133A                  |                                         |
| UR-27   | ✓                                |                   | SPCC4B3.13-A229V                    |                                         |
| UR-28   | ✓                                |                   | Mug72-N116S                         |                                         |
| UR-29   | ✓                                |                   | Mug72-N116S                         |                                         |
| UR-30   | ✓                                |                   | -                                   |                                         |

## Supplementary Information Table 2. *Schizosaccharomyces pombe* strains used in this study.

| Strain number | Name                  | Description                                              |
|---------------|-----------------------|----------------------------------------------------------|
| 143           | wt                    | <i>h</i> - ED972 wild-type                               |
| B4411         | SR-1                  | Stable 16 mM Caffeine Resistant Isolate – From wt – 1    |
| B4412         | SR-2                  | Stable 16 mM Caffeine Resistant Isolate – From wt – 2    |
| B4413         | UR-1                  | Unstable 16 mM Caffeine Resistant Isolate – From wt – 1  |
| B4414         | UR-2                  | Unstable 16 mM Caffeine Resistant Isolate – From wt – 2  |
| B4415         | UR-3                  | Unstable 16 mM Caffeine Resistant Isolate – From wt – 3  |
| B4416         | UR-4                  | Unstable 16 mM Caffeine Resistant Isolate – From wt – 4  |
| B4417         | UR-5                  | Unstable 16 mM Caffeine Resistant Isolate – From wt – 5  |
| B4418         | UR-6                  | Unstable 16 mM Caffeine Resistant Isolate – From wt – 6  |
| B4419         | UR-7                  | Unstable 16 mM Caffeine Resistant Isolate – From wt – 7  |
| B4420         | UR-8                  | Unstable 16 mM Caffeine Resistant Isolate – From wt – 8  |
| B4421         | UR-9                  | Unstable 16 mM Caffeine Resistant Isolate – From wt – 9  |
| B4422         | UR-10                 | Unstable 16 mM Caffeine Resistant Isolate – From wt – 10 |
| B4423         | UR-11                 | Unstable 16 mM Caffeine Resistant Isolate – From wt – 11 |
| B4424         | UR-12                 | Unstable 16 mM Caffeine Resistant Isolate – From wt – 12 |
| B4425         | UR-13                 | Unstable 16 mM Caffeine Resistant Isolate – From wt – 13 |
| B4426         | UR-14                 | Unstable 16 mM Caffeine Resistant Isolate – From wt – 14 |
| B4427         | UR-15                 | Unstable 16 mM Caffeine Resistant Isolate – From wt – 15 |
| B4428         | UR-16                 | Unstable 16 mM Caffeine Resistant Isolate – From wt – 16 |
| B4429         | UR-17                 | Unstable 16 mM Caffeine Resistant Isolate – From wt – 17 |
| B4430         | UR-18                 | Unstable 16 mM Caffeine Resistant Isolate – From wt – 18 |
| B4431         | UR-19                 | Unstable 16 mM Caffeine Resistant Isolate – From wt – 19 |
| B4432         | UR-20                 | Unstable 16 mM Caffeine Resistant Isolate – From wt – 20 |
| B4433         | UR-21                 | Unstable 16 mM Caffeine Resistant Isolate – From wt – 21 |
| B4434         | UR-22                 | Unstable 16 mM Caffeine Resistant Isolate – From wt – 22 |
| B4435         | UR-23                 | Unstable 16 mM Caffeine Resistant Isolate – From wt – 23 |
| B4436         | UR-24                 | Unstable 16 mM Caffeine Resistant Isolate – From wt – 24 |
| B4437         | UR-25                 | Unstable 16 mM Caffeine Resistant Isolate – From wt – 25 |
| B4438         | UR-26                 | Unstable 16 mM Caffeine Resistant Isolate – From wt – 26 |
| B4439         | UR-27                 | Unstable 16 mM Caffeine Resistant Isolate – From wt – 27 |
| B4440         | UR-28                 | Unstable 16 mM Caffeine Resistant Isolate – From wt – 28 |
| B4441         | UR-29                 | Unstable 16 mM Caffeine Resistant Isolate – From wt – 29 |
| B4442         | UR-30                 | Unstable 16 mM Caffeine Resistant Isolate – From wt – 30 |
| B4443         | SR-1 <i>clr4Δ</i> - 1 | SR-1 <i>clr4Δ::NAT</i> - transformant 1                  |
| B4444         | SR-1 <i>clr4Δ</i> - 2 | SR-1 <i>clr4Δ::NAT</i> - transformant 2                  |
| B4445         | SR-1 NAT control - 1  | SR-1 <i>NAT:3' of ura4</i> - transformant 1              |
| B4446         | SR-1 NAT control - 2  | SR-1 <i>NAT:3' of ura4</i> - transformant 2              |
| B4447         | SR-2 <i>clr4Δ</i> - 1 | SR-2 <i>clr4Δ::NAT</i> - transformant 1                  |
| B4448         | SR-2 <i>clr4Δ</i> - 2 | SR-2 <i>clr4Δ::NAT</i> - transformant 2                  |
| B4449         | SR-2 NAT control - 1  | SR-2 <i>NAT:3' of ura4</i> - transformant 1              |
| B4450         | SR-2 NAT control - 2  | SR-2 <i>NAT:3' of ura4</i> - transformant 2              |
| B4451         | UR-1 <i>clr4Δ</i> - 1 | UR-1 <i>clr4Δ::NAT</i> - transformant 1                  |
| B4452         | UR-1 <i>clr4Δ</i> - 2 | UR-1 <i>clr4Δ::NAT</i> - transformant 2                  |
| B4453         | UR-1 NAT control-1    | UR-1 <i>NAT:3' of ura4</i> - transformant 1              |
| B4454         | UR-1 NAT control-2    | UR-1 <i>NAT:3' of ura4</i> - transformant 2              |
| B4455         | UR-2 <i>clr4Δ</i> - 1 | UR-2 <i>clr4Δ::NAT</i> - transformant 1                  |
| B4456         | UR-2 <i>clr4Δ</i> - 2 | UR-2 <i>clr4Δ::NAT</i> - transformant 2                  |
| B4457         | UR-2 NAT control - 1  | UR-2 <i>NAT:3' of ura4</i> - transformant 1              |
| B4458         | UR-2 NAT control - 2  | UR-2 <i>NAT:3' of ura4</i> - transformant 2              |
| B4352         | Pap1-N424STOP         | <i>h</i> - <i>pap1-N424STOP</i>                          |
| B4459         | UR-2 +14 days -CAF    | UR-2 after growth on -CAF media for 14 days              |
| B4460         | <i>hba1Δ</i>          | <i>h</i> - <i>hba1Δ::NAT</i>                             |
| B4461         | <i>SPBC17G9.12cΔ</i>  | <i>h</i> - <i>SPBC17G9.12cΔ::NAT</i>                     |
| B4462         | <i>ncRNA.393Δ</i>     | <i>h</i> - <i>ncRNA.393Δ::NAT</i>                        |

|       |                                     |                                                                               |
|-------|-------------------------------------|-------------------------------------------------------------------------------|
| B4463 | <i>ncRNA.394Δ</i>                   | <i>h- ncRNA.394Δ::NAT</i>                                                     |
| B4464 | <i>eno101Δ</i>                      | <i>h- eno101Δ::NAT</i>                                                        |
| B3797 | <i>TetR-Clr4*</i>                   | <i>h+ leu1+adh21-TetROFF-2xFLAG-Clr4-cdd</i>                                  |
| B3808 | <i>4xtetO-II</i>                    | <i>h- 4xtetO 3' of SPBC17G9.13c leu1-32</i>                                   |
| B3813 | <i>4xtetO-I</i>                     | <i>h- 4xtetO 5' of hba1 leu1-32</i>                                           |
| B3820 | <i>4xtetO-III</i>                   | <i>h- 4xtetO 5' of ura4 leu1-32</i>                                           |
| B4465 | <i>TetR-Clr4* + 4xtetO-II</i>       | <i>h+ leu1+adh21-TetROFF-2xFLAG-Clr4-cdd 4xtetO 3' of SPBC17G9.13c</i>        |
| B4466 | <i>TetR-Clr4* + 4xtetO-I</i>        | <i>h+ leu1+adh21-TetROFF-2xFLAG-Clr4-cdd 4xtetO 5' of hba1</i>                |
| B4467 | <i>TetR-Clr4* + 4xtetO-III</i>      | <i>h+ leu1+adh21-TetROFF-2xFLAG-Clr4-cdd 4xtetO 5' of ura4</i>                |
| B4468 | UR-2 (7 days +CAF)                  | UR-2 after growth on +CAF media for 3 days                                    |
| B4469 | UR-2 (7 days +CAF<br>→14 days -CAF) | UR-2 after growth on +CAF media for 3 days and then on -CAF media for 14 days |

### Supplementary Information Table 3. Oligonucleotides used in this study.

| Name      | Sequence                                                                                                               | Description                                                                      |
|-----------|------------------------------------------------------------------------------------------------------------------------|----------------------------------------------------------------------------------|
| qAct1-F   | GGTTTCGCTGGAGATGATG                                                                                                    | qPCR <i>act1</i> <sup>+</sup> - F                                                |
| qAct1-R   | ATACCACGCTTGCTTTGAG                                                                                                    | qPCR <i>act1</i> <sup>+</sup> - R                                                |
| qDg-F     | AATTGTGGTGGTGTGGTAATAC                                                                                                 | qPCR <i>dg</i> repeats - F                                                       |
| qDg-R     | GGGTTTCATCGTTTCCATTGAG                                                                                                 | qPCR <i>dg</i> repeats - R                                                       |
| ST-52     | GAATTGTGGAGCCATGTCCC                                                                                                   | qPCR <i>slu7</i> <sup>+</sup> - F                                                |
| ST-53     | TCTTCTCCTGTCCAACGAGC                                                                                                   | qPCR <i>slu7</i> <sup>+</sup> - R                                                |
| ST-872    | GAAACCCAGAAATTCGAGGT                                                                                                   | qPCR <i>kin17</i> <sup>+</sup> - F - primer pair 1 <i>hba1</i> locus             |
| ST-873    | ATGAGTTGCTGGGCATCCA                                                                                                    | qPCR <i>kin17</i> <sup>+</sup> - R - primer pair 1 <i>hba1</i> locus             |
| ST-62     | CAGCAAATGGGGACTGTGT                                                                                                    | qPCR <i>ish1</i> <sup>+</sup> - F - primer pair 2 <i>hba1</i> locus              |
| ST-63     | CTCAAGAAGCCTGGGAGTCA                                                                                                   | qPCR <i>ish1</i> <sup>+</sup> - R - primer pair 2 <i>hba1</i> locus              |
| ST-64     | CGATGATCTGGTTGTATGGTGG                                                                                                 | qPCR <i>hba1</i> <sup>+</sup> - F - primer pair 3 <i>hba1</i> locus              |
| ST-65     | TGCTCAGTACGCCATCTTGA                                                                                                   | qPCR <i>hba1</i> <sup>+</sup> - R - primer pair 3 <i>hba1</i> locus              |
| ST-66     | GGGCTATCCTTAACGCTCTTC                                                                                                  | qPCR <i>hba1</i> <sup>+</sup> <i>cds</i> - F - primer pair 4 <i>hba1</i> locus   |
| ST-67     | CGCCTCCTCTGAACCAAAAG                                                                                                   | qPCR <i>hba1</i> <sup>+</sup> <i>cds</i> - R - primer pair 4 <i>hba1</i> locus   |
| ST-58     | CTTCCCACATCGCGTTCATT                                                                                                   | qPCR <i>alp4</i> <sup>+</sup> - F - primer pair 5 <i>hba1</i> locus              |
| ST-59     | ACCTAAATCATCGCTGCTGG                                                                                                   | qPCR <i>alp4</i> <sup>+</sup> - R - primer pair 5 <i>hba1</i> locus              |
| ST-393    | GGGCATGACAATCTCCGACT                                                                                                   | qPCR <i>pyr1</i> <sup>+</sup> - F - primer pair 1 <i>ncRNA.394</i> locus         |
| ST-394    | GGCCTACCTCGGTGATCTTG                                                                                                   | qPCR <i>pyr1</i> <sup>+</sup> - R - primer pair 1 <i>ncRNA.394</i> locus         |
| ST-401    | CCGTATGGTGAAGCAGGGTT                                                                                                   | qPCR <i>SPBC17G9.12c</i> <sup>+</sup> - F - primer pair 2 <i>ncRNA.394</i> locus |
| ST-402    | CCCGATCTCCGTGTAAGCAA                                                                                                   | qPCR <i>SPBC17G9.12c</i> <sup>+</sup> - R - primer pair 2 <i>ncRNA.394</i> locus |
| ST-184    | TTCGTCGATGCCCTCTTGC                                                                                                    | qPCR <i>SPBC17G9.13c</i> <sup>+</sup> - F - primer pair 3 <i>ncRNA.394</i> locus |
| ST-185    | AAAATCCGCCATTTGCCAG                                                                                                    | qPCR <i>SPBC17G9.13c</i> <sup>+</sup> - R - primer pair 3 <i>ncRNA.394</i> locus |
| ST-251    | TGCTGTAGTGATGCAGAGGAG                                                                                                  | qPCR <i>ncRNA.393</i> <sup>+</sup> - F - primer pair 4 <i>ncRNA.394</i> locus    |
| ST-252    | GCGGCCATTTTGTTTACATTCC                                                                                                 | qPCR <i>ncRNA.393</i> <sup>+</sup> - R - primer pair 4 <i>ncRNA.394</i> locus    |
| ST-190    | GAAAATTAGCGCGCCGTTA                                                                                                    | qPCR <i>ncRNA.394</i> <sup>+</sup> - F - primer pair 5 <i>ncRNA.394</i> locus    |
| ST-191    | TCAATCTGCTTGTCCCACCC                                                                                                   | qPCR <i>ncRNA.394</i> <sup>+</sup> - R - primer pair 5 <i>ncRNA.394</i> locus    |
| ST-263    | GTGCTGCCAAAAGAAGCTC                                                                                                    | qPCR <i>eno101</i> <sup>+</sup> - F - primer pair 6 <i>ncRNA.394</i> locus       |
| ST-264    | TGGGAACCACCGTTCAAGAC                                                                                                   | qPCR <i>eno101</i> <sup>+</sup> - R - primer pair 6 <i>ncRNA.394</i> locus       |
| ST-249    | AGTTCCTAAGGTAGCGGGTG                                                                                                   | qPCR <i>cut2</i> <sup>+</sup> - F                                                |
| ST-250    | TTCCTCTGCTCAGCGTAGAC                                                                                                   | qPCR <i>cut2</i> <sup>+</sup> - R                                                |
| PA-354    | CAGTTAGTTTCAGGTTTCCC                                                                                                   | qPCR +2.5 kb <i>ura4</i> <sup>+</sup> - F - primer pair 1 <i>ura4</i> locus      |
| PA-355    | GCAGAGTAATGGTGATTGG                                                                                                    | qPCR +2.5 kb <i>ura4</i> <sup>+</sup> - R - primer pair 1 <i>ura4</i> locus      |
| ST-874    | CACACAGTTTCAGAAGAAC                                                                                                    | qPCR <i>tam14</i> <sup>+</sup> - F - primer pair 2 <i>ura4</i> locus             |
| ST-875    | GTTACGAGGAATCTTGGTAG                                                                                                   | qPCR <i>tam14</i> <sup>+</sup> - R - primer pair 2 <i>ura4</i> locus             |
| ST-796    | CGCGACTGACAAGTTGCTTT                                                                                                   | qPCR <i>ura4</i> <sup>+</sup> - F - primer pair 3 <i>ura4</i> locus              |
| ST-797    | AGCTAGAGCTGAGGGGATGA                                                                                                   | qPCR <i>ura4</i> <sup>+</sup> - R - primer pair 3 <i>ura4</i> locus              |
| ST-800    | TGGTTTAAATCAAATCTCCATGCG                                                                                               | qPCR 5' of <i>ura4</i> <sup>+</sup> - F - primer pair 4 <i>ura4</i> locus        |
| ST-801    | TGAGCAAACCTGCTTTTGTGGT                                                                                                 | qPCR 5' of <i>ura4</i> <sup>+</sup> - R - primer pair 4 <i>ura4</i> locus        |
| ST-788    | GGATGAAGCTGTCTCCCTGG                                                                                                   | qPCR <i>new25</i> <sup>+</sup> - F - primer pair 5 <i>ura4</i> locus             |
| ST-789    | TATTGCTGCTTCTCCCTGGC                                                                                                   | qPCR <i>new25</i> <sup>+</sup> - R - primer pair 5 <i>ura4</i> locus             |
| ST-876    | GGAATCTATGTCGTTGCCG                                                                                                    | qPCR <i>pmp20</i> <sup>+</sup> - F - primer pair 6 <i>ura4</i> locus             |
| ST-877    | GTAAACTCTCCGTTCCAGTC                                                                                                   | qPCR <i>pmp20</i> <sup>+</sup> - R - primer pair 6 <i>ura4</i> locus             |
| Clr4-KO-F | ATTTTTAAATTCGTTTCAGGCA<br>TCATTTGGAGGGTTTGCTAAA<br>AATCATCTACCAACAAGAG<br>GTTATTAGTTTTGCGACGGAT<br>CCCCGGGTTAATTAA     | KO of <i>clr4</i> <sup>+</sup> with Bahler construct - F                         |
| Clr4-KO-R | AAATGAATGACCTTTTTTCAGTT<br>TAACAGTAATGGAGAAAAACA<br>AATTGTAATTATTGGAGTCAAC<br>CAGTAATAAATTAGCGAATTC<br>GAGCTCGTTTAAAC  | KO of <i>clr4</i> <sup>+</sup> with Bahler construct - R                         |
| ST-3      | GTCCAACACCCAGTTGTTAAC<br>TGCTTATAATGACGCGTATGAT<br>TGCGATATTTAAGACTCTGGC<br>CATCCACCCTTTATCCGACG<br>GATCCCCGGGTTAATTAA | Inserting natMX6 marker 3' of <i>ura4</i> <sup>+</sup> (Control) - F             |
| ST-12     | GCAGTTCTAGTAATGCGCAT<br>TCAATTTGTAGTATTTCTAAATA                                                                        | Inserting natMX6 marker 3' of <i>ura4</i> <sup>+</sup> (Control) - R             |



|        |                                                                                                                    |                                                                 |
|--------|--------------------------------------------------------------------------------------------------------------------|-----------------------------------------------------------------|
|        | ATCATTAACGACAAGGGCCTT<br>CCGTGCTATAGTGTGAATTCGA<br>GCTCGTTAAAC                                                     |                                                                 |
| ST-866 | CtagaGGTCTCgGACTCTCCATTTTCGT<br>TAGAATTAGTTTcGAGACCttCC                                                            | Golden Gate cloning pap1-sgRNA-1-F                              |
| ST-867 | GGaagGGTCTCgAAACTAATTCTAACG<br>AAAATGGAGAGTCcGAGACCtctaG                                                           | Golden Gate cloning pap1-sgRNA-1-R                              |
| ST-868 | AGCATGGCGCGAACCCGCTGAATCA<br>TTGGACAAAGAATTCTTTAACGACGA<br>GGGTGAAATAGATGATGTTTTTCATAA<br>TTATTTTCATAATTCTAACGTC   | Pap1-N424STOP - HR template - F                                 |
| ST-869 | GCTCAGGGAATGATTTCGTTGGCATTTC<br>TCCAGAAAATCAAGACCATGCAATGA<br>ATTAGTGATCAAGTCTCCATTTTCGTT<br>AGACGTTAGAATTATGAAAAT | Pap1-N424STOP - HR template - R                                 |
| ST-284 | CAGCTGTGTGTTTGATTGAATCCACA<br>TTGCTCCTCATGTACTCATAGCTAGG<br>TGAAATATATTAGGCTTTCAGTGATTC<br>GCGGATCCCCGGGTTAATTAA   | KO of <i>hba1<sup>+</sup></i> with Bahler construct - F         |
| ST-285 | GAATGAATAAGAACCATAGTGAAGA<br>GCTAAAAAAGAATCGAAAAGTACTT<br>ACTATTTTACGAGTGGATCTTCTATC<br>TCGCGAATTCGAGCTCGTTAAAC    | KO of <i>hba1<sup>+</sup></i> with Bahler construct - R         |
| ST-391 | TCTTCTGCCTAACCATACTACTTCTT<br>CTAGCCTTCAGACTTAAAAAGCTTCG<br>CCTTTAGAAAACATCTCTATTCTTTC<br>AAACGGATCCCCGGGTTAATTAA  | KO of <i>SPBC17G9.12c<sup>+</sup></i> with Bahler construct - F |
| ST-392 | CAAGAGAGATGGAAAACAGAGGA<br>ATTGTGAACGTTCTCCTTATTCATAT<br>TTCCATAAAGCTTCTCCAATGACCTT<br>TATTGGAATTCGAGCTCGTTAAAC    | KO of <i>SPBC17G9.12c<sup>+</sup></i> with Bahler construct - F |
| ST-307 | GATAAAATCTTAGAGATTGTTGCTA<br>AATAAGCAAACAGTGTCTTTGCTGT<br>AACTGGTGAATATGTTTTAAATTA<br>TCACGGATCCCCGGGTTAATTAA      | KO of <i>ncRNA.393<sup>+</sup></i> with Bahler construct - F    |
| ST-308 | TGATATAATATATTTTCTTCTTACT<br>ATTACATTTCTATTTTTTACCATT<br>ACGATATGTGAACACTATCTAACCC<br>GAATTCGAGCTCGTTAAAC          | KO of <i>ncRNA.393<sup>+</sup></i> with Bahler construct - R    |
| ST-95  | TAATGAAAAAGGTTGCTAATTGGTTT<br>GTTATATAAGAGTATGTCGCATTTGT<br>TTACGATAGGAGAGAGCGATTTTCC<br>ACACGGATCCCCGGGTTAATTAA   | KO of <i>ncRNA.394<sup>+</sup></i> with Bahler construct - F    |
| ST-96  | TATTACTATGACTCTGGTTCTAGCTC<br>GACTCTGACCCTTGCCTGACATACA<br>AATACTTTGCTCTTTTCAAATGTACC<br>GTGAATTCGAGCTCGTTAAAC     | KO of <i>ncRNA.394<sup>+</sup></i> with Bahler construct - R    |
| ST-305 | ATATATAGAGTGAAGGGCCGTCCG<br>TTAGGACTTGTTCAGTAAGAATCAAT<br>TAGTATTCTACAGTAAACATCGTTAAT<br>CCGGATCCCCGGGTTAATTAA     | KO of <i>eno101<sup>+</sup></i> with Bahler construct - F       |
| ST-306 | CTACTTCTACTACAACAACAGTTTAC<br>TTTAATACTAATAATAAATAAACACG<br>CAACCTGGCAAATTAATCCAAAACG<br>CAAGAATTCGAGCTCGTTAAAC    | KO of <i>eno101<sup>+</sup></i> with Bahler construct - R       |
| ST-756 | CtagaGGTCTCgGACTGGTGTGTTGACT<br>TCTAATCTGTTTcGAGACCttCC                                                            | Golden Gate cloning 4tetO-I-sgRNA-F                             |
| ST-757 | GGaagGGTCTCgAAACAAGATTAGAAG<br>TCAAGCACCAGTCcGAGACCtctaG                                                           | Golden Gate cloning 4tetO-I-sgRNA-R                             |
| ST-732 | AAACGCTAATCTAGCATGTCATGAAGG                                                                                        | Making 4tetO-I-HR-template - 1F                                 |
| ST-733 | actagtaggccttgCCGTATTGAAATCAAAA<br>TTATTAATAATGAGTAAGTGAATATATA<br>CCA                                             | Making 4tetO-I-HR-template - 1R                                 |
| ST-734 | TGATTTCAATACGGcaaggcctactagtgcat<br>gca                                                                            | Making 4tetO-I-HR-template - 2F                                 |
| ST-735 | TCTATAACTTTTACGTTAGctggattcgttt<br>acctcaccac                                                                      | Making 4tetO-I-HR-template - 2R                                 |
| ST-736 | gaggtaaacgaaatccagCTAACGTAAAAGT<br>TATAGACAGTATTATAACAAGTATTATT<br>GTAAAA                                          | Making 4tetO-I-HR-template - 3F                                 |

|        |                                                                         |                                       |
|--------|-------------------------------------------------------------------------|---------------------------------------|
| ST-737 | TTTAATTGTATTTTTTTATTCAAAGGTTCTACTTTGTCAATCATTTTTCAA                     | Making 4tetO-I-HR-template - 3R       |
| ST-752 | CtagaGGTCTCgGACTATTTCTTTGCTTTACGGTCGTTTcGAGACCcttCC                     | Golden Gate cloning 4tetO-II-sgRNA-F  |
| ST-753 | GGaagGGTCTCgAAACGACCGTAAAGCAAAAGAAATAGTCcGAGACCtctaG                    | Golden Gate cloning 4tetO-II-sgRNA-R  |
| ST-720 | TTGAATTAATTCATAGAGTATGATAAAAATTGATAGTAAATTCATTGG                        | Making 4tetO-II-HR-template - 1F      |
| ST-721 | cactagtaggccttgATGCATGCTAATAAA TCATCGTAACTCAAGTAG                       | Making 4tetO-II-HR-template - 1R      |
| ST-722 | TTTATTAGCATGCATcaaggcctactagtgc atgca                                   | Making 4tetO-II-HR-template - 2F      |
| ST-723 | TTTTTTTTTTCATAAATATTTActgga tttcgtttaccctaccacc                         | Making 4tetO-II-HR-template - 2R      |
| ST-724 | tggtaggtaaacgaaatccagTAAATTTTATGAAAAAAAAAATAAATGATTCATAACAA GCAGATGAAAA | Making 4tetO-II-HR-template - 3F      |
| ST-725 | TTTGTAATGTATAATCTTCATTTATTTT GAAGAGTCCTAATTCGT                          | Making 4tetO-II-HR-template - 3R      |
| ST-760 | CtagaGGTCTCgGACTATATTTTAGATA GTTCTGTGGTTTcGAGACCcttCC                   | Golden Gate cloning 4tetO-III-sgRNA-F |
| ST-761 | GGaagGGTCTCgAAACCACAGA ACTATCTAAAATATAGTCcGAGACCtctaG                   | Golden Gate cloning 4tetO-III-sgRNA-R |
| ST-744 | CGGTAAGAAAACACGACATGTGCAG                                               | Making 4tetO-III-HR-template - 1F     |
| ST-745 | catgcactagtaggccttgTATAATTAAGATG TTTTAGAGACTTATACAATTTGTCTTT ATAAATTCT  | Making 4tetO-III-HR-template - 1R     |
| ST-746 | CTAAACATCTTAATTATAcaggccta ctagtgc atgca                                | Making 4tetO-III-HR-template - 2F     |
| ST-747 | TTTGCAC TTTGTGAATctggatttcgttt acctcaccacca                             | Making 4tetO-III-HR-template - 2R     |
| ST-748 | gtaaacgaaatccagATTCACAAAGTGC AAACATTATCATGAAAAAGAAC                     | Making 4tetO-III-HR-template - 3F     |
| ST-749 | TGAAAAAGATAATCAGCCTTATAATC TTTACAAAAGTAAGAAATTCT                        | Making 4tetO-III-HR-template - 3R     |

**Figure 1**

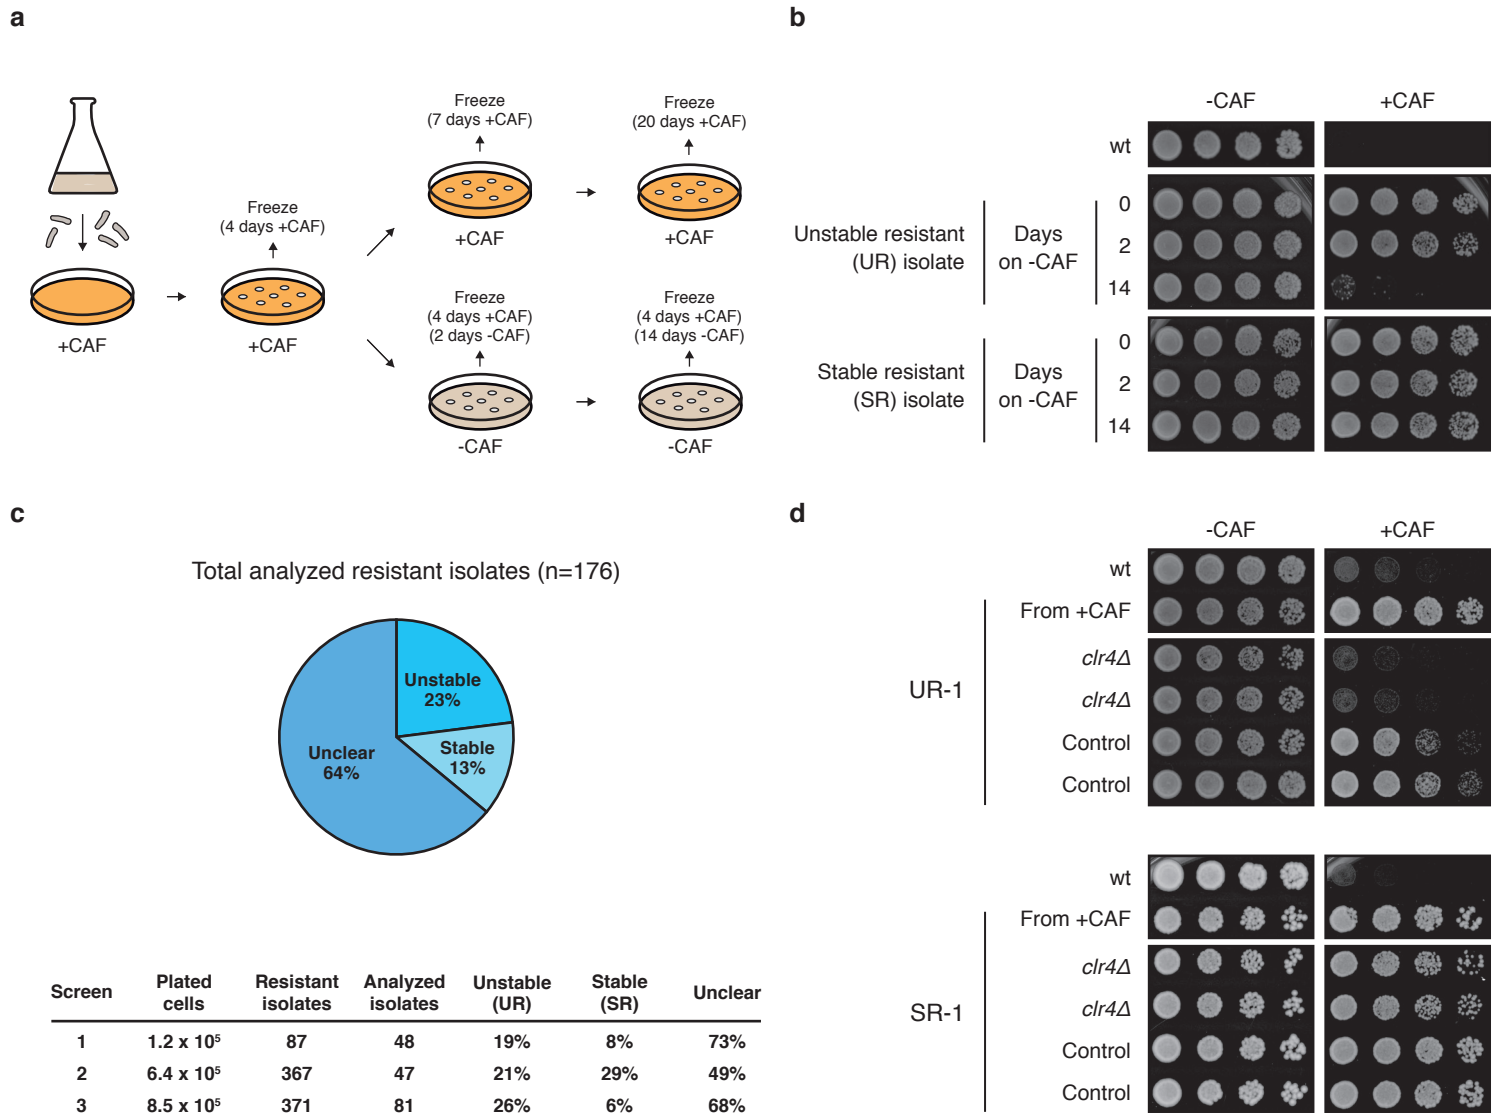

**Figure 1. Identification of heterochromatin-dependent epimutants resistant to caffeine**

**a**, Schematic of the screening strategy. *S. pombe* wild-type (wt) cells were plated on caffeine-containing (+CAF) plates. Caffeine-resistant isolates were then grown on +CAF plates for 4, 7 or 20 days or on non-selective (-CAF) medium plates for 2 and 14 days. Cells were then serially diluted and spotted on -CAF and +CAF media to assess resistance to caffeine.

**b**, Unstable (UR) and stable (SR) caffeine-resistant isolates were identified. After growth on non-selective media for 14 days caffeine resistance is lost in UR isolates but not in SR isolates.

**c**, Frequency of unstable (UR) / stable (SR) caffeine-resistant isolates obtained from 3 independent screens. 64% of isolates did not display a clear phenotype (unclear).

**d**, Caffeine resistance in UR isolates depends on the Clr4 H3K9 methyltransferase. *clr4<sup>+</sup>* (*clr4Δ*) or an unlinked intergenic region (Control) were deleted in unstable (UR-1) and stable (SR-1) caffeine-resistant isolates.

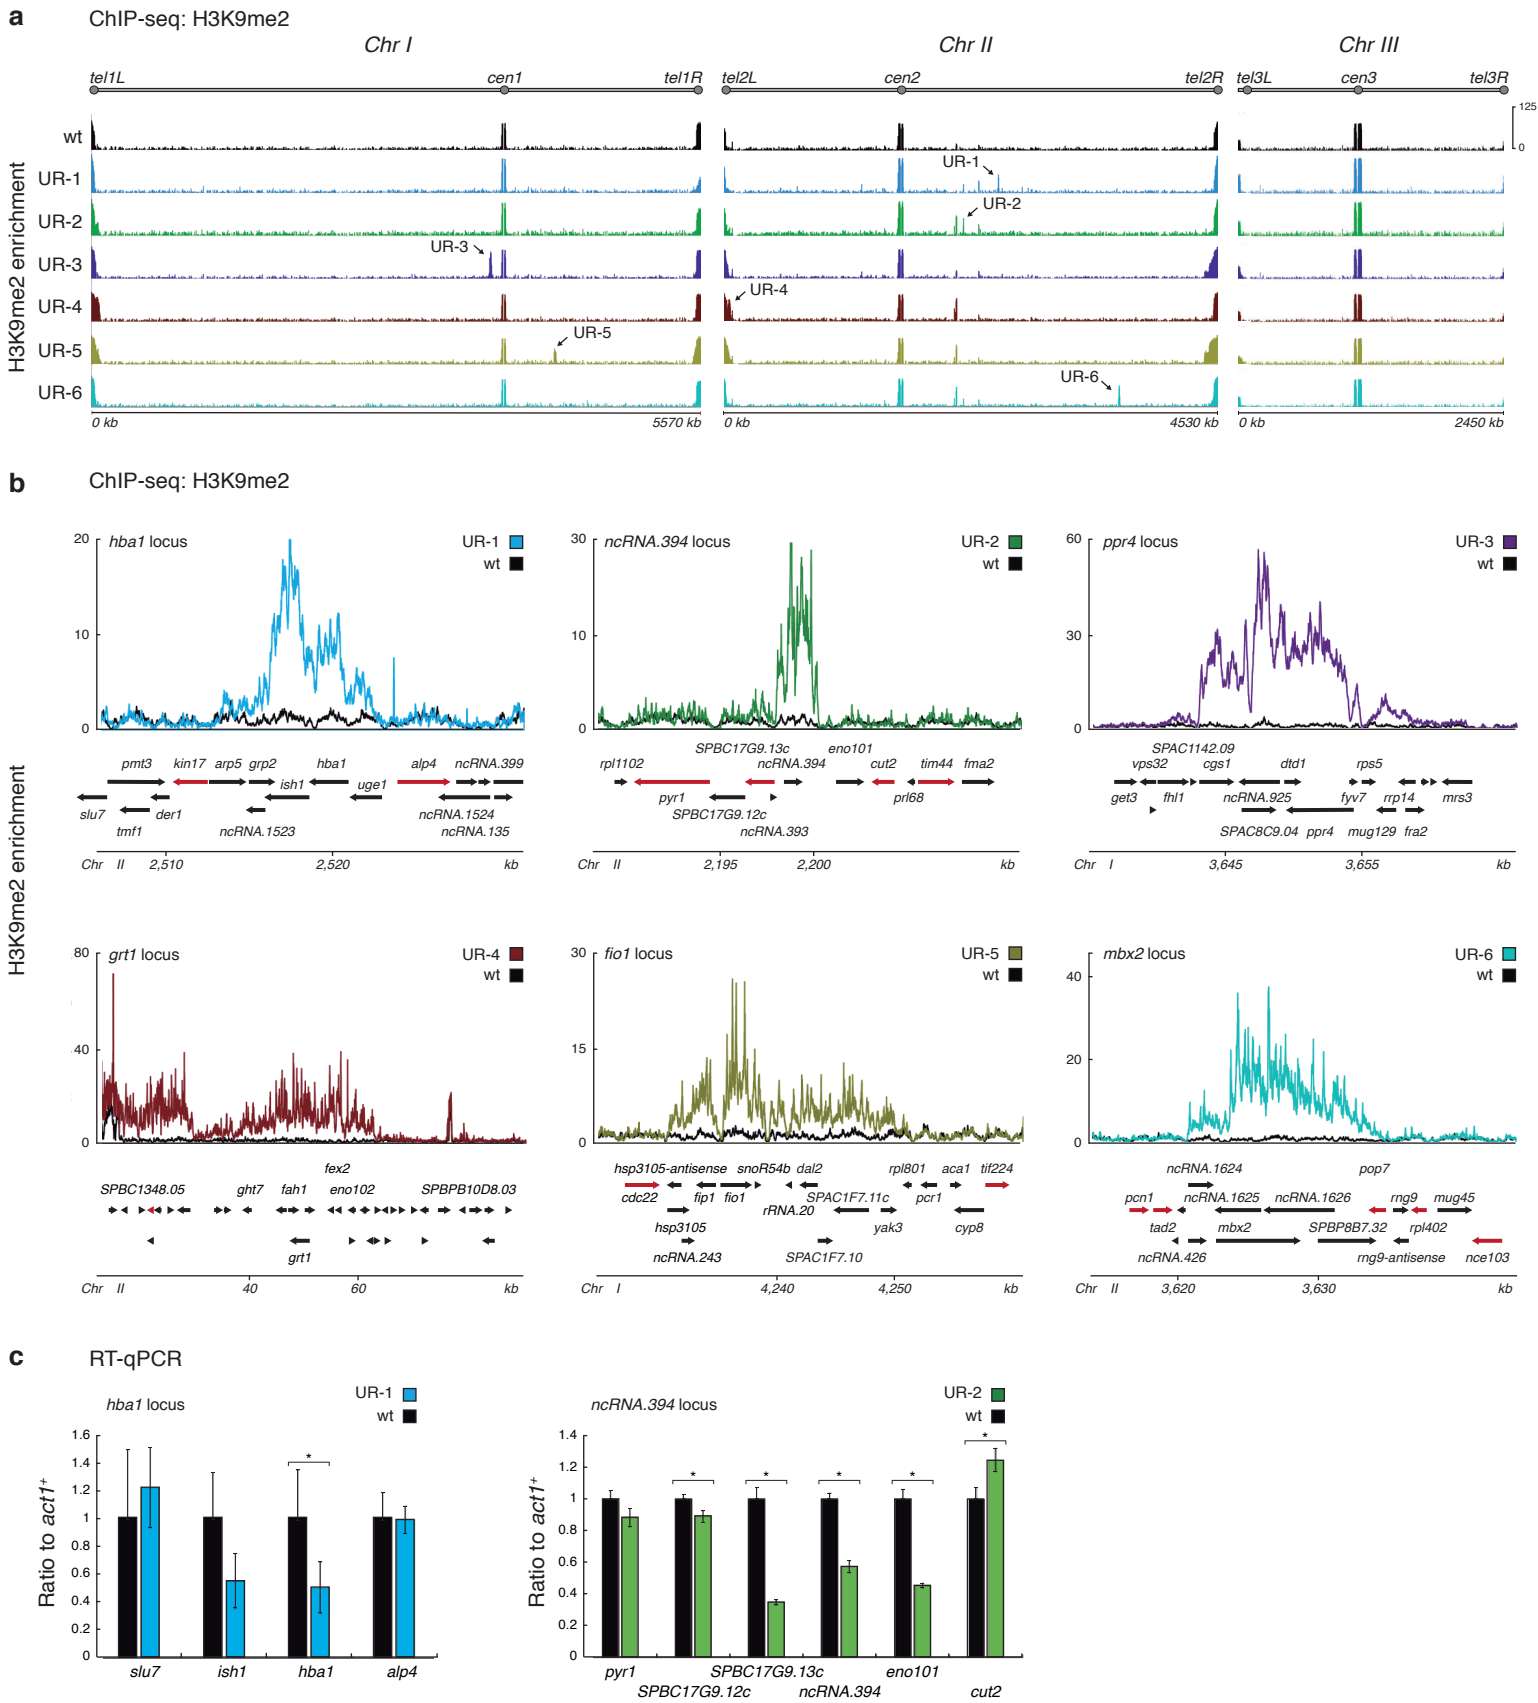

**Figure 2. Ectopic domains of heterochromatin are detected in unstable (UR) caffeine-resistant isolates**

**a**, Genome-wide H3K9me2 ChIP-seq enrichment in UR isolates and wt. Data are represented as relative fold enrichment over input.

**b**, H3K9me2 ChIP-seq enrichment at ectopic heterochromatin domains in individual isolates. Data are represented as relative fold enrichment over input and compared to levels in wt cells. Relevant genes within and flanking ectopic heterochromatin domains are indicated. Red arrows indicate essential genes.

**c**, Gene transcript levels within and flanking ectopic heterochromatin domains in isolates UR-1 and UR-2. Data are mean  $\pm$  SD (error bars) ( $n = 3$  experimental replicates). \*  $P < 0.05$  ( $t$  test).

**Figure 3**

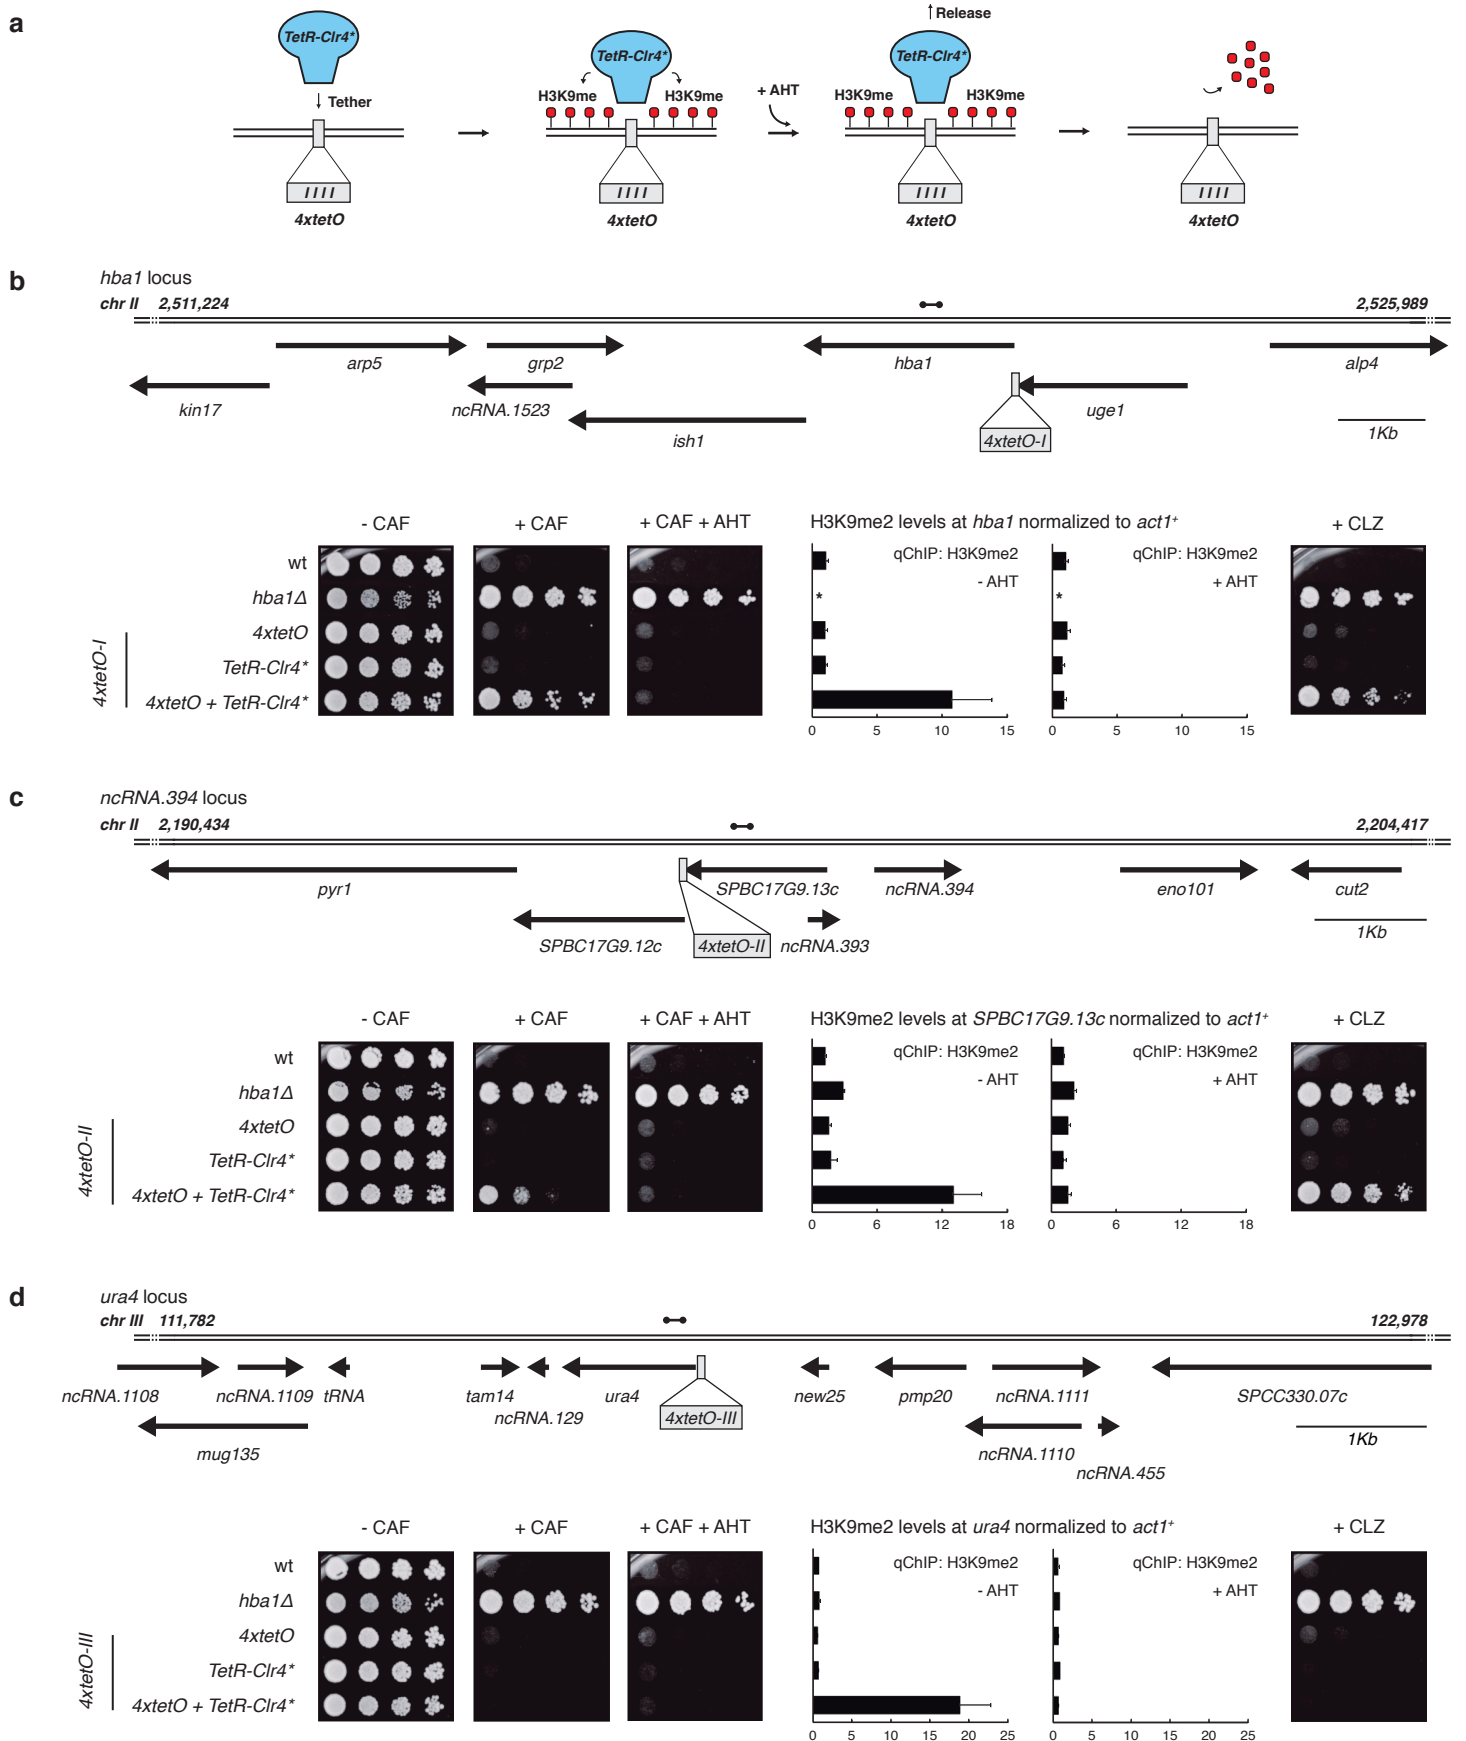

**Figure 4**

**a** ChIP-Seq: H3K9me2

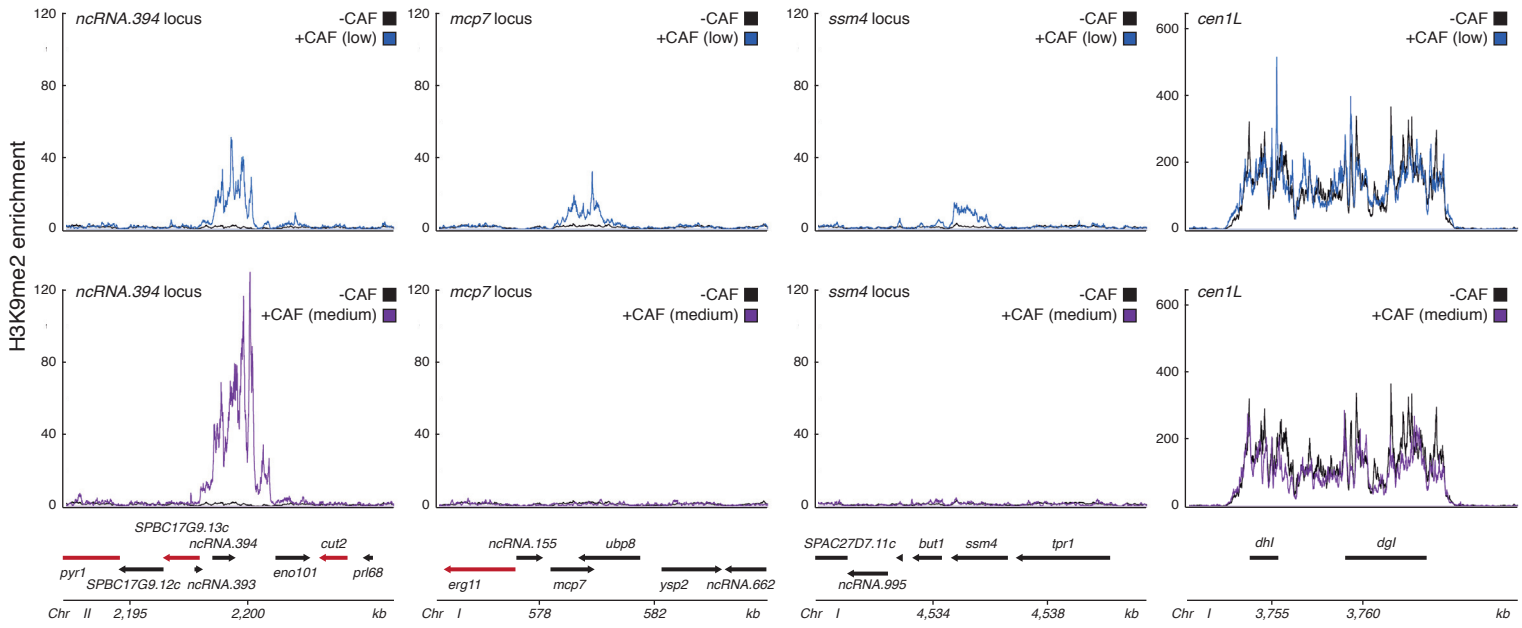

**b** ChIP-Seq: H3K9me2

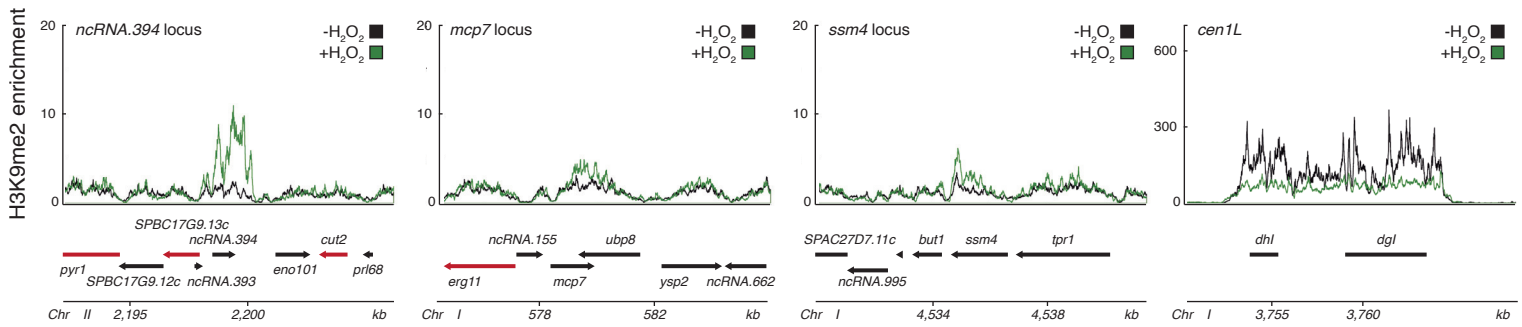

**Figure 4. Dynamic heterochromatin redistribution following short exposure to external insults in wild-type cells**

**a**, H3K9me2 ChIP-seq enrichment at *ncRNA.394*, *mcp7* and *ssm4* loci following 18 hr exposure to low (7 mM, top) or medium (14 mM, bottom) concentrations of caffeine.

**b**, H3K9me2 ChIP-seq enrichment at *ncRNA.394*, *mcp7* and *ssm4* loci following 18hr exposure to a low concentration of hydrogen peroxide (1 mM).

**a-b**, Data are represented as relative fold enrichment over input and compared to levels in wt cells. Relevant genes within and flanking ectopic heterochromatin domains are indicated. Red arrows indicate essential genes. H3K9me2 enrichment at pericentromeric *dhl* and *dgl* repeats (*cen1L*) of chromosome I shown as control (note different scale).

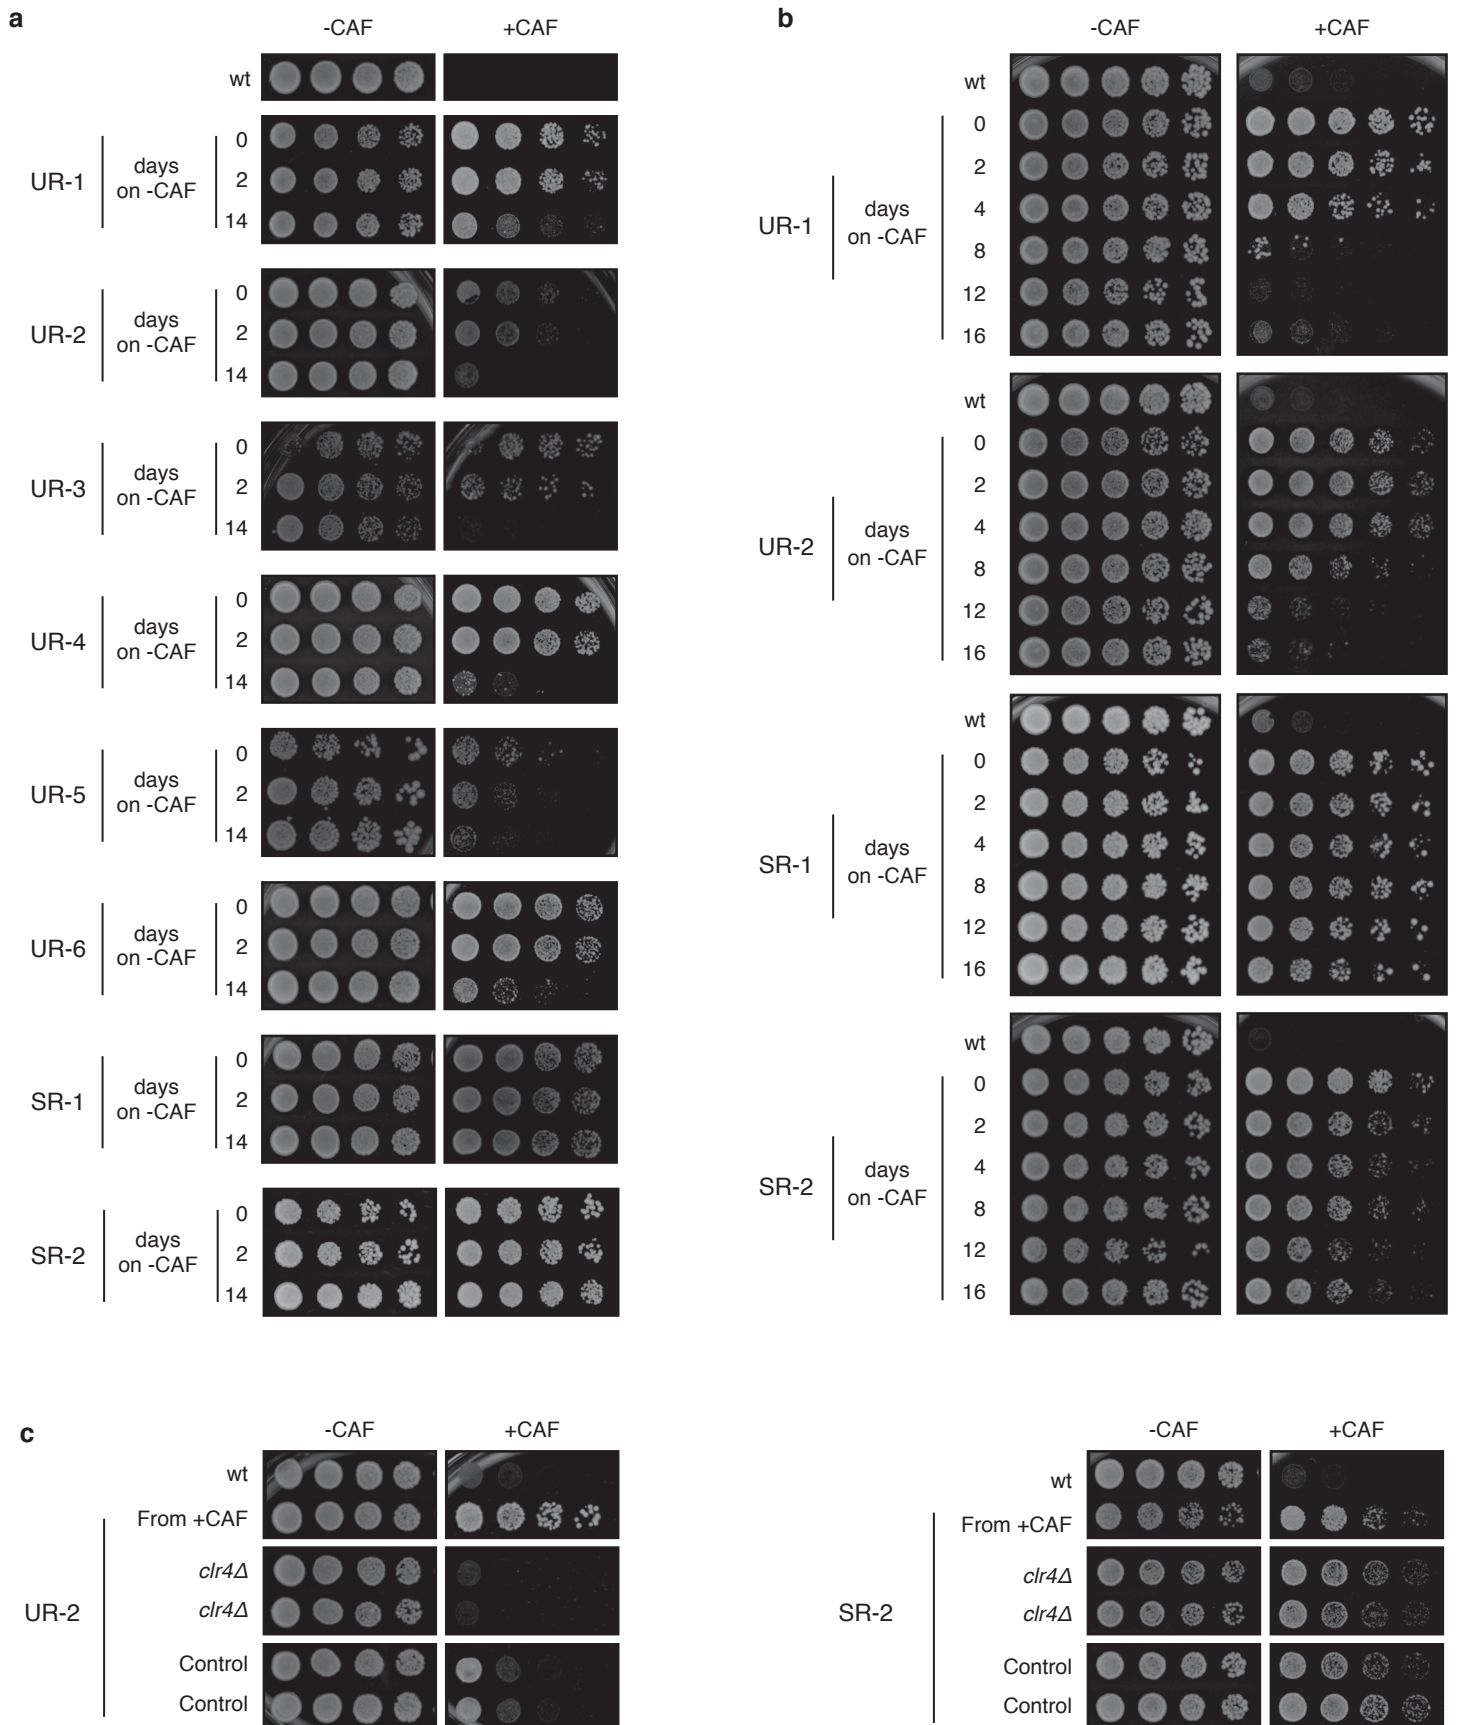

**Extended Data Figure 1. Identification of heterochromatin-dependent epimutants resistant to caffeine**

**a**, Unstable (UR) and stable (SR) caffeine-resistant isolates were identified using our screening strategy. After growth on non-selective media for 14 days caffeine resistance is lost in UR isolates but not in SR isolates.

**b**, Caffeine resistance is lost progressively in unstable (UR) isolates but maintained in stable (SR) isolates.

**c**, Caffeine resistance in UR isolates depends on the Clr4 H3K9 methyltransferase. *clr4<sup>+</sup>* (*clr4Δ*) or an unlinked intergenic region (Control) were deleted in unstable (UR-2) and stable (SR-2) caffeine-resistant isolates.

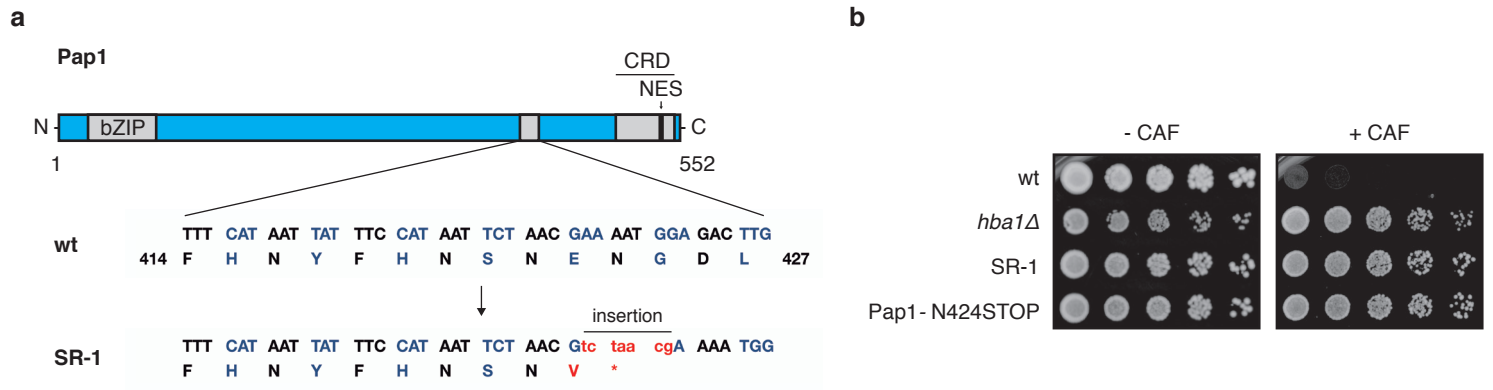

**Extended Data Figure 2. A mutation in *pap1*<sup>+</sup> confers caffeine resistance in the stable isolate SR-1**

**a**, High-throughput sequencing of the stable isolate SR-1 revealed a 7-nucleotide insertion in *pap1*<sup>+</sup>. The insertion results in a truncated version of Pap1 (Pap1-N424STOP) lacking the Nuclear Export Signal (NES).

**b**, Pap1-N424STOP is resistant to caffeine. The 7-nucleotide insertion identified in SR-1 was introduced in wt cells (Pap1-N424STOP) and caffeine resistance was assessed. *hba1*Δ and SR-1 cells were used as positive controls.



Extended Data Figure 3

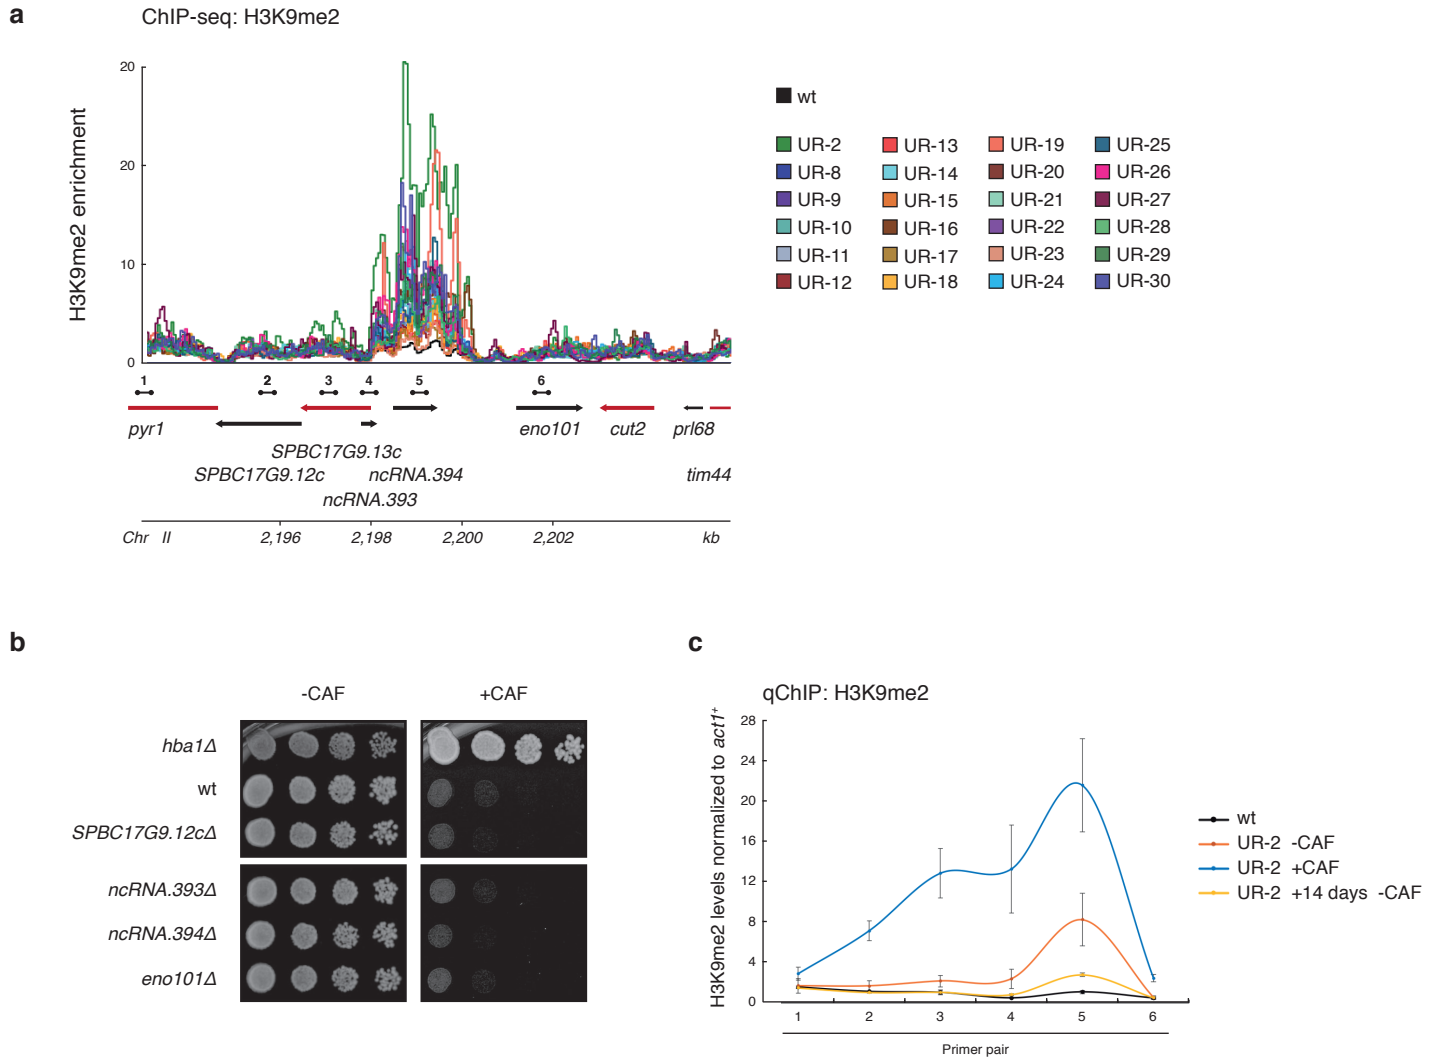

**Extended Data Figure 3. 24 of 30 unstable (UR) caffeine-resistant isolates present an ectopic heterochromatin domain over the *ncRNA.394* locus**

**a**, H3K9me2 ChIP-seq enrichment at the *ncRNA.394* locus in individual isolates. Data are represented as relative fold enrichment over input and compared to levels in wt cells. Relevant genes within and flanking ectopic heterochromatin domains are indicated. Red arrows indicate essential genes. Dumbbells indicate oligonucleotides used in **c**.

**b**, Deletion of *ncRNA.394* or non-essential adjacent genes does not result in caffeine resistance.

**c**, Quantitative chromatin immunoprecipitation (qChIP) of H3K9me2 levels at the *ncRNA.394* locus in UR-2 cells. UR-2 cells were grown in the absence (-CAF) or presence (+CAF) of caffeine overnight or in the absence of caffeine for 14 days (+14 days -CAF). Data are mean  $\pm$  SD (error bars) ( $n = 3$  experimental replicates). Oligonucleotides used are indicated in **a**.

Extended Data Figure 4

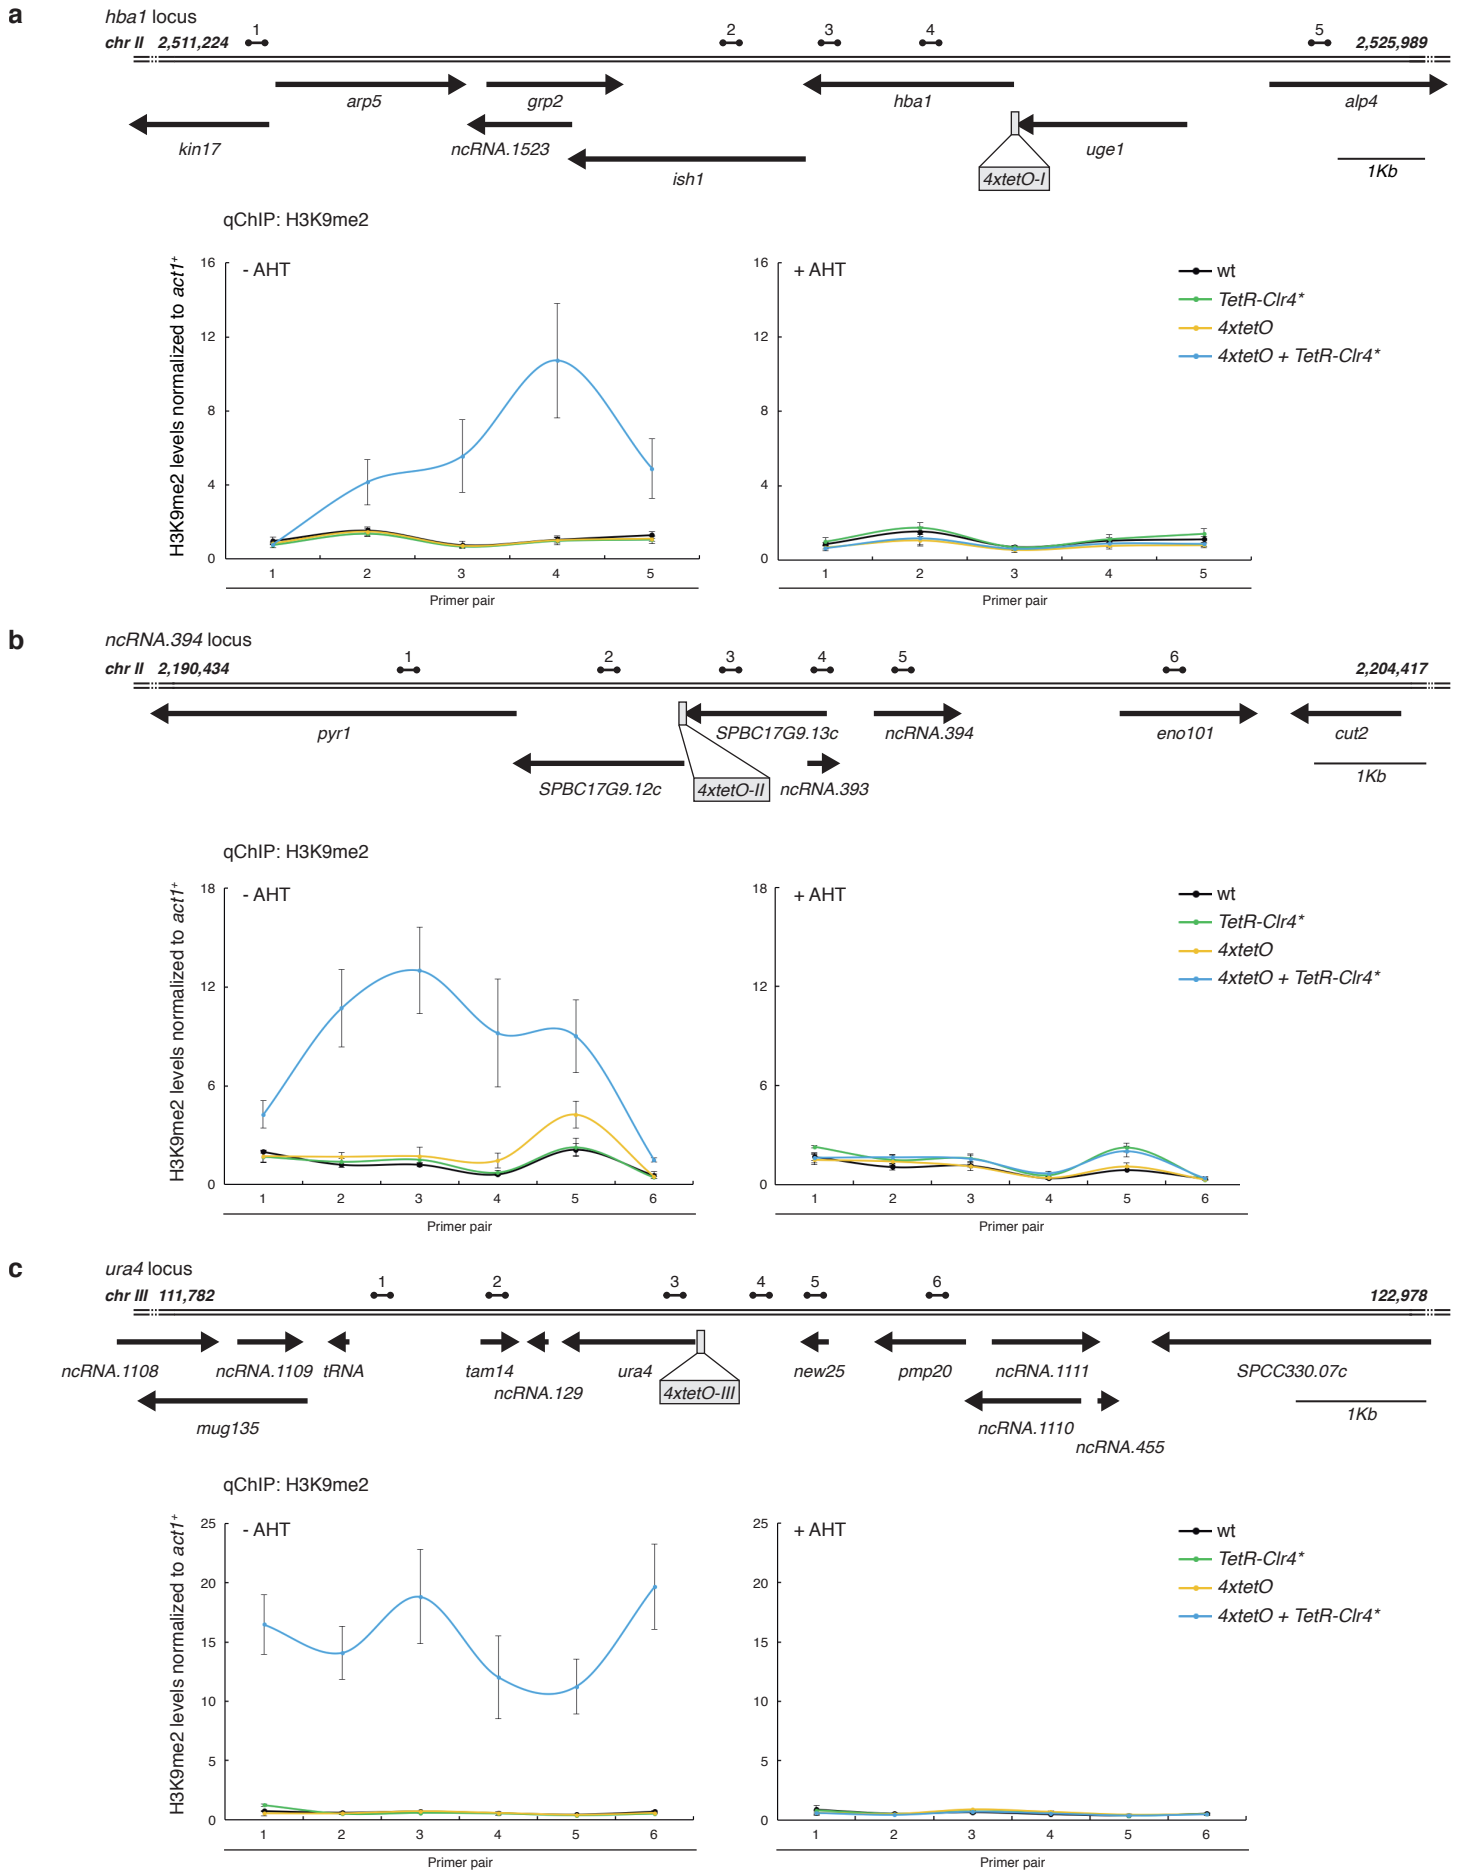

Extended Data Figure 4. Forced synthetic heterochromatin placement at the identified loci is sufficient to drive caffeine resistance in wild-type cells

**a-c**, Quantitative chromatin immunoprecipitation (qChIP) of H3K9me2 levels in wild-type cells harbouring *4xtetO* binding sites at the identified ectopic heterochromatin loci (or *ura4* as control) and expressing *TetR-Clr4\** in the absence or presence of AHT. **a**, *hba1* locus. **b**, *ncRNA.394* locus. **c**, *ura4* locus. Data are mean  $\pm$  SD (error bars) ( $n = 3$  experimental replicates). Dumbbells indicate oligonucleotides used.

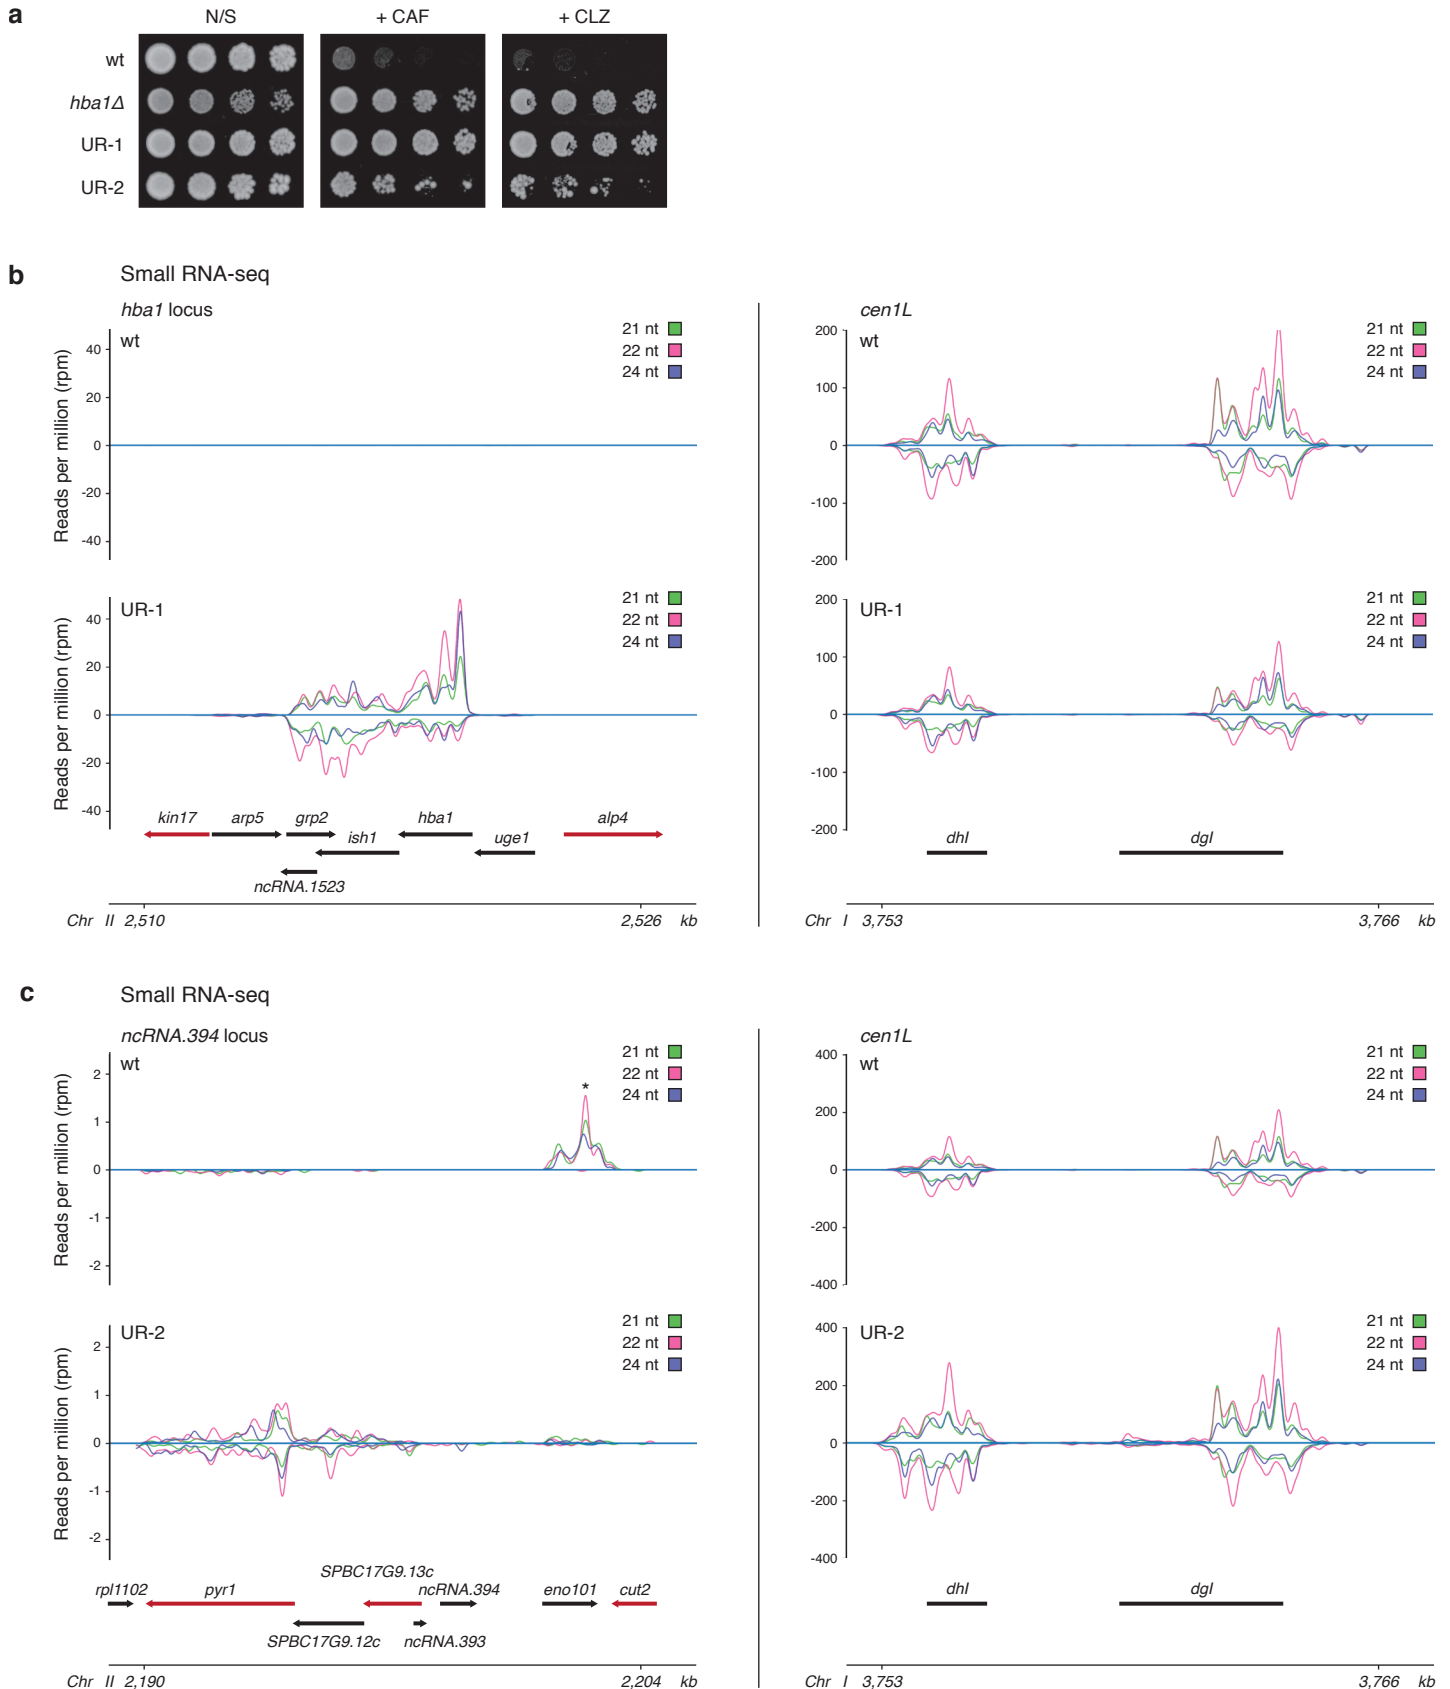

**Extended Data Figure 5. Unstable (UR) caffeine-resistant isolates show cross-resistance to the fungicide clotrimazole and siRNA generation at ectopic heterochromatin domains**

**a**, Unstable caffeine-resistant isolates UR-1 and UR-2 were serially diluted and spotted on non-selective (N/S), +CAF and +CLZ plates to assess resistance to caffeine and clotrimazole.

**b-c**, Left, small RNA sequencing showing presence of siRNAs (21-24 nucleotides) at ectopic heterochromatin domains in UR-1 (**b**, *hba1* locus) and UR-2 (**c**, *ncRNA.394* locus) cells compared to wt cells. Right, pericentromeric siRNAs mapping to *dhl* and *dgl* repeats (*cen1L*) of chromosome I shown as control. Experiments were performed twice with similar results. \*Transcripts mapping to the highly expressed gene *eno101*<sup>+</sup> in euchromatic wt conditions (note these are unidirectional RNAs and not siRNAs).

Extended Data Figure 6

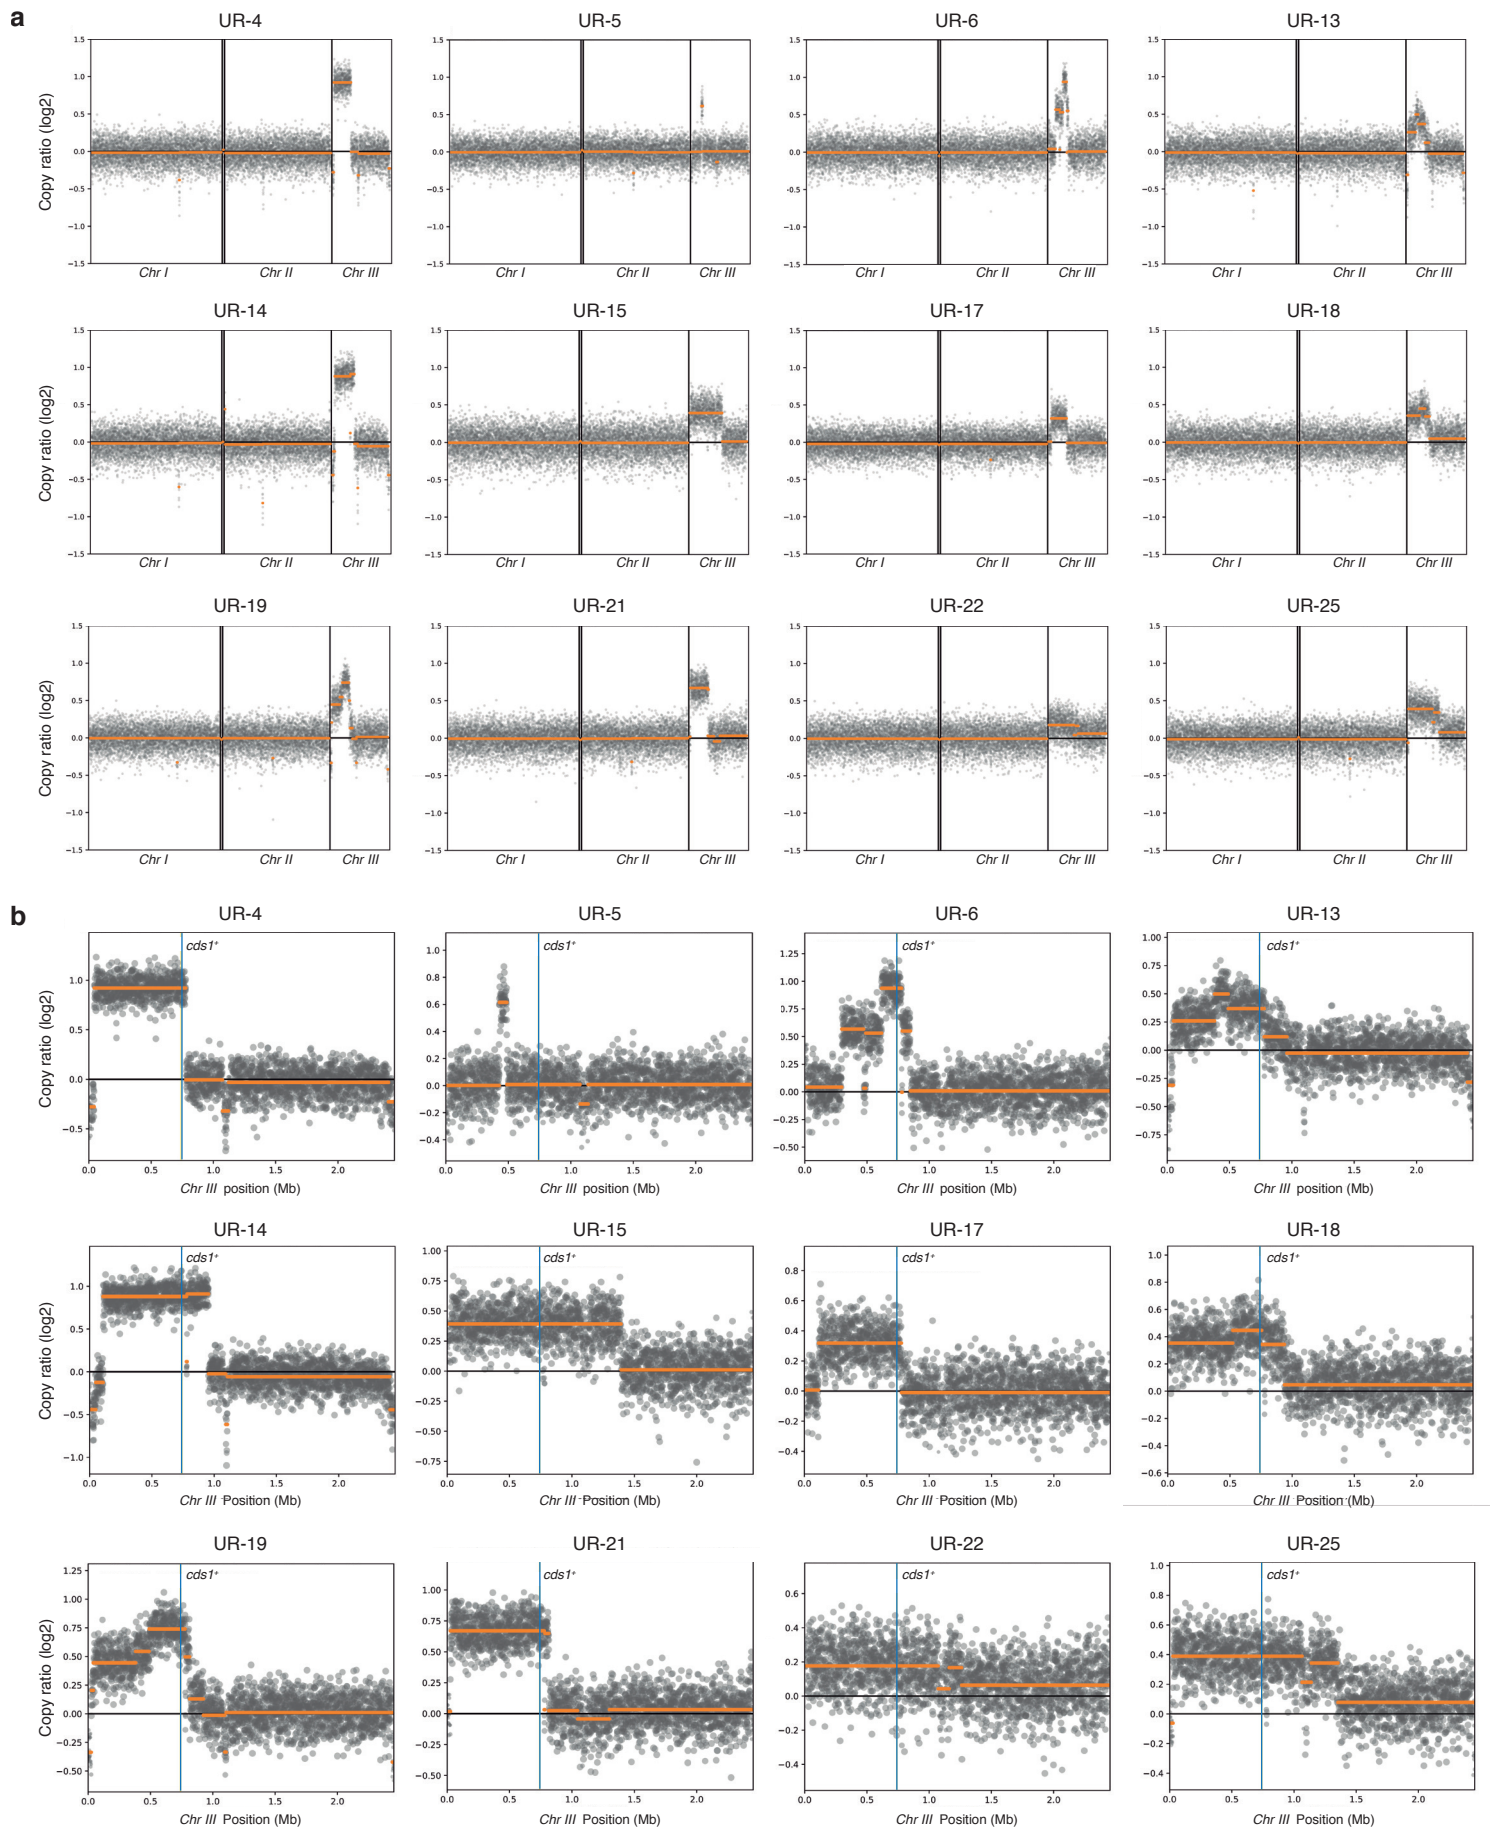

**Extended Data Figure 7**

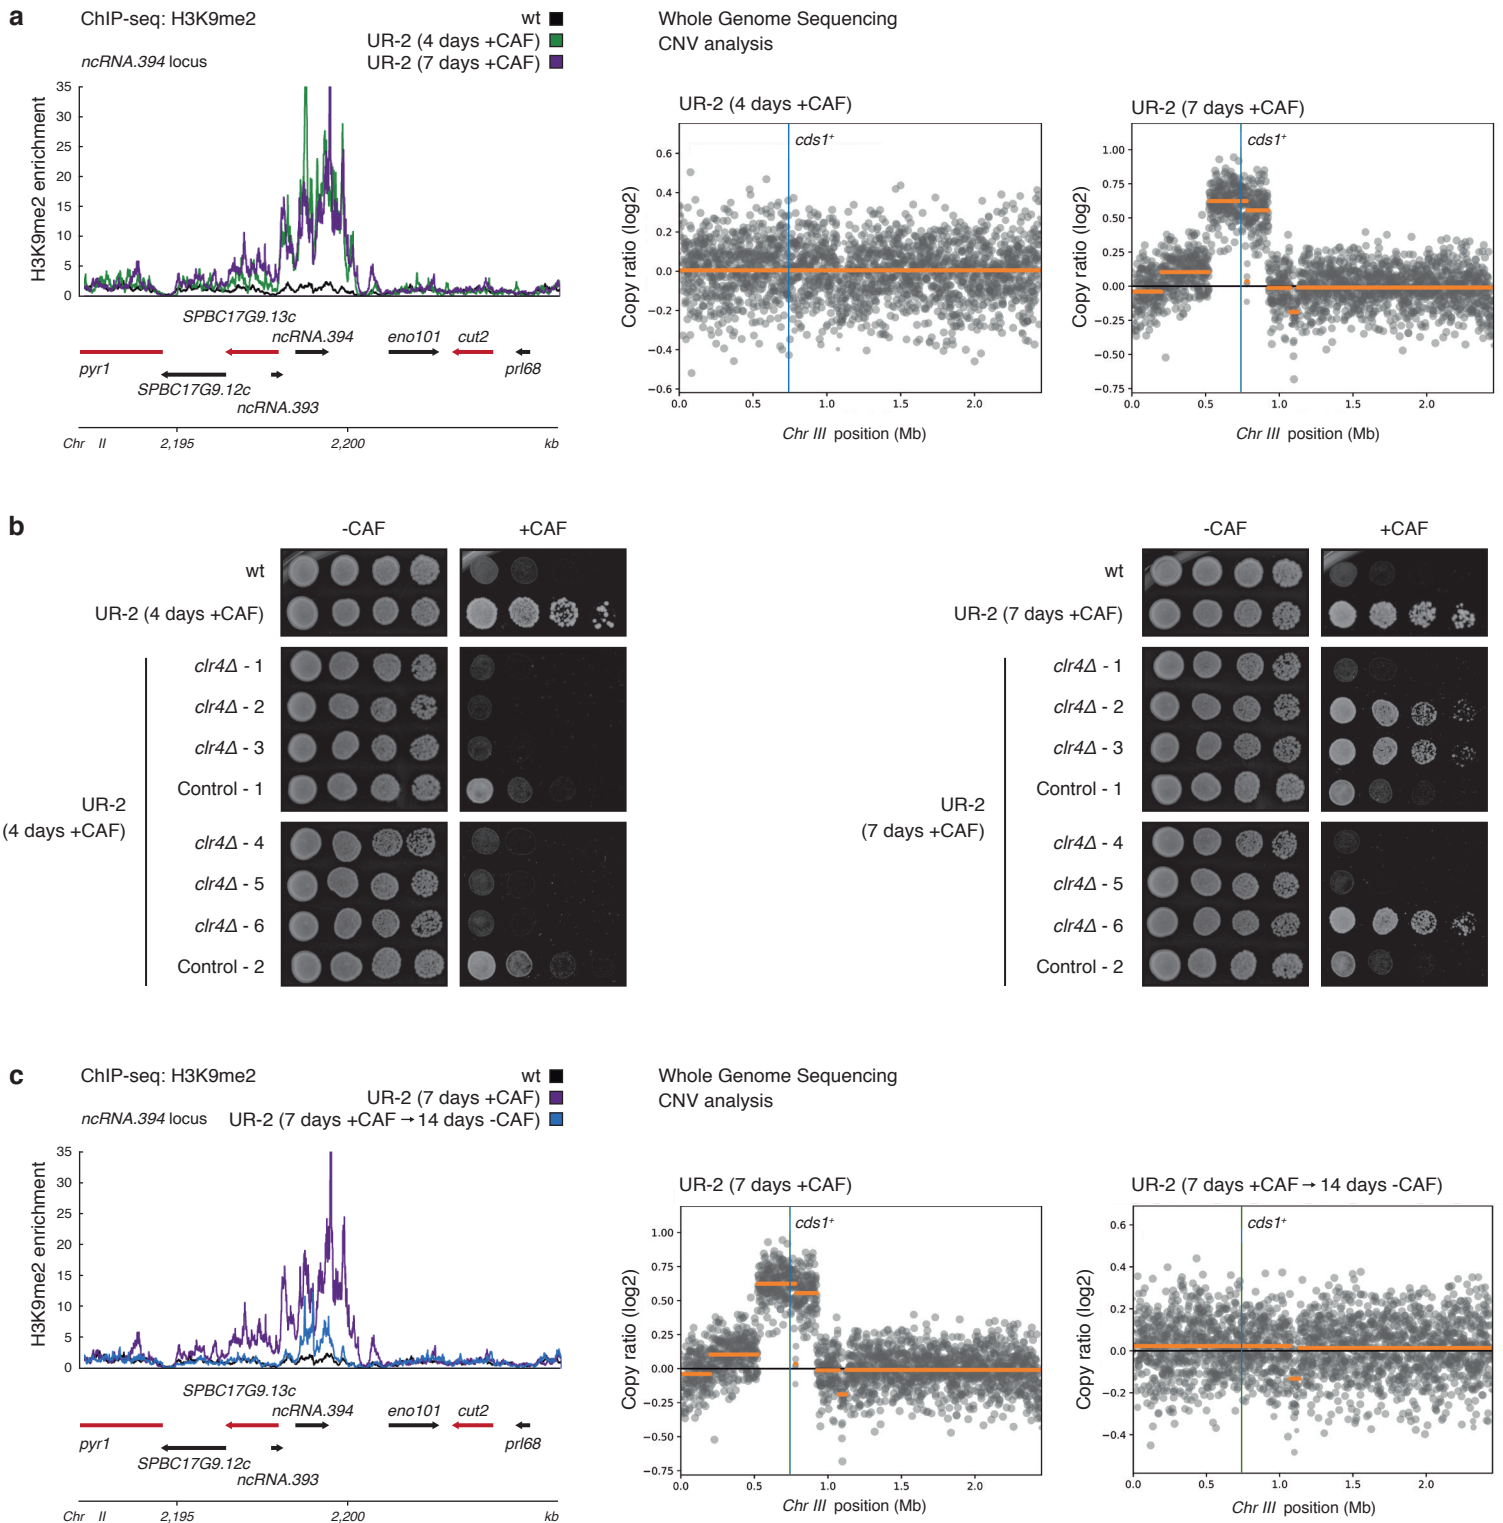

**Extended Data Figure 7. Epigenetic changes preceded genetic changes (CNV) in unstable caffeine-resistant isolate UR-2**

**a**, H3K9me2 ChIP-seq enrichment at the *ncRNA.394* locus (left) and chromosome III coverage plots with overlaid segments (right) in UR-2 cells following prolonged growth on +CAF media for 3 days (7 days +CAF). Wild-type ChIP-seq input data were used as the reference for CNV analysis.

**b**, *clr4<sup>+</sup>* (*clr4Δ*) or an unlinked intergenic region (Control) were deleted in UR-2 cells (4 days +CAF) and UR-2 cells after prolonged growth on +CAF media for 3 days (7 days +CAF). All (6/6) UR-2 (4 days +CAF) *clr4Δ* transformants lost resistance to caffeine whereas only 50% (3/6) UR-2 (7 days +CAF) lost resistance to caffeine.

**c**, H3K9me2 ChIP-seq enrichment at the *ncRNA.394* locus (left) and chromosome III coverage plots with overlaid segments (right) in UR-2 cells following prolonged growth on non-selective media for 14 days after prolonged growth on +CAF media for 3 days (7 days +CAF → 14 days -CAF). Wild-type ChIP-seq input data were used as the reference for CNV analysis.

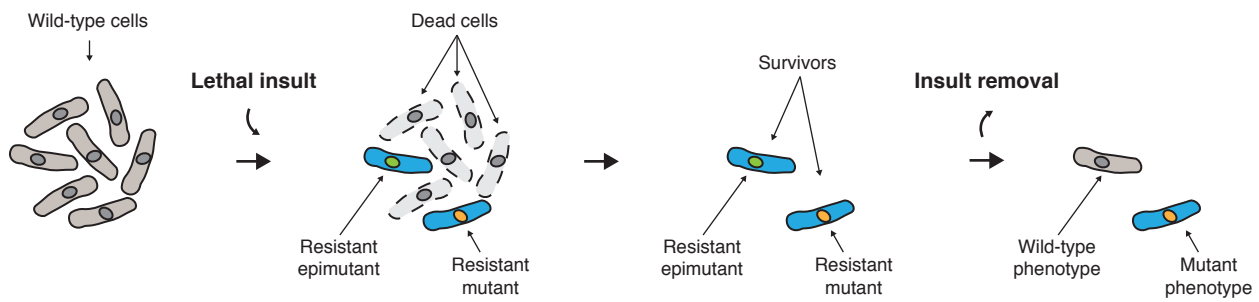

### Extended Data Figure 8. Model

Resistant isolates arise following exposure to a lethal insult. Resistance might be mediated by permanent, DNA-based mutations (resistant mutants) or reversible, heterochromatin-based epimutations (resistant epimutants). Upon insult removal, resistant epimutants can revert to the wild-type phenotype by disassembling ectopic domains of heterochromatin, whereas resistant mutants continue displaying the mutant phenotype due to the genetic nature of DNA mutations.
